# Supplementary material for: The Peculiar Landscape of Repetitive Sequences in the Olive (Olea europaea L.) Genome
Source: PubMed Central journal article supplement (PMC4007544; doi:10.1093/gbe/evu058), 2014-03-26
Supplement: supp_evu058_Barghini_et_al_SupplMat_S1.pdf [file supp_evu058_Barghini_et_al_SupplMat_S1.pdf]

Supplementary Materials S1. Multifasta file with 16 olive sequences whose redundancy in the olive genome was previously determined by slot blot and hybridization by Natali et al (2007), Stergiou et al. (2002), and Giordani (unpublished).

>Oec01|AJ620478.2|#RLC

```
ACGACAGGTAGTGGCAGAACAATTGCTATTGTTAGAGAGATTCATACAGAGAAGAATCCA
ATTGATATGATGAAAAATTTAGTGACCGGAGAAAAGTTTGAGCTTTGTACCGAATTGGCT
GGCATGGATTCTAACTAATTTGTTAGAAAATAATTTCCCTCCTCAATGGGCTAGAGGGGA
AAATTGTTATAATGATCCAGCCACTAAGCCTATTATAAGAATTAATTGGCCCAAATTTT
ATATTGTTTAATTAGATTAATAATGGTGGTTATATATAAAAATACATCCCTCTCTCTCTT
GGCTGTTTTGTGTGAGAGAAATCTAATGGTCAACAACGGCAGCTAGAAGTTTTGAAAAAG
TTGTGGCTGTTGAGTGGAAATAGAGAGAGGAAGGACCGGCTGAAAGAGAAGAAAAATTGG
TGGCTGTTGGGGAATAAACTATTGCTACTAGAAAGAATTTTTTTTATTGAGGTGTGGAAT
CACAAATGTTATTTTTCTTCTCCATAATATATAAATTGGGAATTTCTCTAAAATATATTT
TGGATTTGTATTCAAAGTAGGTTCTTACAAGGTTGATCAAATTGCTGATTTGTTGTAAGA
TAAATCGTTGCTTAGAGATAGATTATTGTAGTATTTCCAATTTGTGGAGAATTCAGTT
TTGAGGCATAATCTTCAATATTGTAATCGATTTTAATTATTATAGTAGATTTTGACCAGG
GTTGCCCGTGATTTTTTTCCCTTTACATTGGAGGGTTTTTTCCACGTAAAATTTGGTGT
TGCCTTTTCTTTTTTTTTGCTTGGATTATTTATTTACATAGTTGATCGTTCTAATTAATT
GCTTGGATTGGTAAATTTATTCTTGCAATAATTGAAATTGCCCAACAGCTCATTCATTA
AGAAGTAATGTGTTGGTTAAGCAATTGATTAATCAATGCTACCATTTTTCTCAAAGAAA
TTAAAGAAGGAAGAAGACATTTGATTCCAGGTAATGGATAGTCTTCTTTTATTCAAAT
TAAGCATGTGATGGCATTACAGAACTTTTTTGAAAAGAATCATCATTAAGTTTTCTCTCTT
GAAAAAATGGCAACTGGAAGTAATTGAATCGATTTATTTAAATTTCTTACCAGTTCTTG
CGTTGTTTAATTTTCTGTGCCTTTGAATTGTCTCCTTACCAGTGGTTTACATGATGAAC
AGAATAAAAAATATTAGTTCCTTTTTGATGGAATCACACGTGATATTTTCTCTGACAG
AAACAAAAAGAAATATTTCTTGAACAATTTAATATGACGTAAAATTTGGTTGATACGATTT
AGATTTTCATTTTCTTCAATTAAGTGTATGTCTTTGATCAAGCTAAAGAACAACAAGAGG
TAGGTCGANTGGGCAATCCTAGAATTTTTTNATGAACCTGAATAATGGAATATTTTATTA
TTTGAGGGGTAAAACAAGATTAGATGGGACTAGAGGAGGTACAACACTGACTGAAGGCATT
GTATTGAAGATTTAATCCTTCAGTTTTATTATACAAGTTGCATTTTGTTTAAGCAAACGG
ATAAGAATTGCAGCTAGGGCTGCCTAGTGTAGGATTAGANAGGTGGACAATGGCTCCACC
TAACTTGCCAGTCACATAACCCATGTTNGGCCAGACCAGGCATACAGGCCAATCCTNTC
CCTGTAGTGTTAAANAGTAAAATTTTACATTGTTTACATGCGAAAATCAAATCAACATA
TAAAAGGCAAGACCAATCGAGTTGGTTTTCATATAATGGCATGACCAATNTATATGAACTC
GAAGGTTTTNTGTAACTNTCAGAAAAGAAGTGGCTTCATTCATGTCTCATTNTCTNT
TGTACAGGTTGTGGTATTGTAGCTTTACT
```

>Oec02|AJ620479.2|#RLC

```
ACGACAGGTAGTGGCAGAACAATTGATATTGTTAAGAAGATTCATAAAGAGAAGAATCCA
ATTGATACGATGACAAAGGTTGTGACCAACCAAAGCTTGAGCTTTGTGCCAGACTGGCC
GGCATGAATTCTAACTAATTTGTTAAAGCATAGTCTCCTTCCTTAGTGGGCTGGAGGGGG
AGATTGTTATATGGGCTAACTTGGTCCAGCCATGATGAAGACTGGCCCAAGCCAATATA
TTATTTAATTAAGTCCCACACACACACACACACACACAAAGGCATTTTGCAACATG
TAAAAGGCAATATTCATTAGTTACATGTTGCTAAAAGGGGTCAATTGCAACATTCAGCAA
GTCTACGTTGCTATTGATTCACTAAATTGAGTTTGACGACATTTTTTTAATTAATGATGC
TAATAATGCTAATACACCCTTTTGCAATGTTCCGGTGTCCATTGTGCTTAAATTTTTATTTT
ATTATGGCAACGTGCAATGCATGTTCCCGTTAATTAGTTTTAGCAACAGGCAATGTACGT
TGCTATTAGATGTTTTACCAACAACATTTGAACGCTGTAATTAGTGTTTTAGCTATGTG
CACTGCGCGTTGCCGTTAACCATTTTAAACAACGCGCATATGAATGTTGCCATTAATCTTT
TTGCANCCTTTCCCTCAGTGAATACAAAGGCAAAACAACCTGGCAGAAANCCTAACTCTG
ATTT
```

>Oec04|AJ620480.2|#RLC

CTCGGACGAAGCACATTGATGTCAGGAATCATTTTTGTGCGTGATGTTATAGAGAAAGGCG  
ATATTTCACTCTCGAAGGTACACACAAATGAGAACCCAGCTGACATGTTAACCAAAGTGG  
TGACGGGTAGCAAGTTTCAACATTACTTGGACTTGCTTCACATTAGTCCGTGTTGATATG  
CCTGATATGCCCGAGAGGGCATGGCCCTTCGGGGCGAGGTTGGAATGAGGTGGAGAGTAT  
ATGAAGGTGGAGGTGAACTACGGAGGCTTGATCCCGAGTTATGGGTACGTAGGCAATCAT  
GGTTTGAATGATGCAGCCAAGTTGGTGCTTGCTACTTCTTCTTGTGTTTCGTCCAAAATTT  
GAGGTCTATCAAATGATGTACGAGGTGGAGAATTGTGAGAAGAGGCTGCTGGTTTTCTGCT  
GCTGGTTTTTCTGCTGGGGCGCCAGGCGCCTGGAGTGGGCGCCTAGGCGCCCCGGTAGGC  
TATATATAGCCATT

>Oec05|AJ620481.2|#RLC

CTCGGACGAAGCACATTGATGTCAGATATACATTTGTTAGAGATAAAAATCTTGAAGGGA  
AGTTGAAGATAAAAATACATTCCATCATCAGACCAAACCTGCAGATCTGTTAACCAAACCAC  
TTGCTCAGTCCAAATCTTGTTTCTCAAAGACAAGTTCCGAGTTAATGAATAAACTCCAG  
CTTGATGAAAGATGTTAAAATGTTTACTAATAGCTGGTGACATACTCCAGTATGGGCGTG  
TGTAAGGTAAGTGGTCCCTTTTACTTGTTTACCACTCTAGCACTTATGGAACCATAATTTAC  
TGGTGTAACTGTACTTGTTCATCACATTTCTGTTTTTTATTTAATTTCAACTCTAAATGA  
CGTTTTGTGATTTGACGCATTAATGTGATAGTTTTTTTTTTGCTTCATATATCAAATCAC  
TAAATGTATGTGTATACTATGTACGGCGACCATGATAATGAGTGACTGCAAATAACATTA  
CTCTTACCTATATTTACCTATATACGTGTTCTTCTCACCTCTCAAATTACTCCAATTATC  
TCTTGAGTTAATGTATTATCGATGCTTATGTGAACTTTTCTGTCTCTTTCT

>Oec06|AJ620482.2|#RLC

CTCGGACGAAGCACATTGATGTCAGGTATCATATTGTGCGTGATGTTATAGAGAAAGGTG  
ATATTTCACTCTCGAAAGTACACACAAATGAGAACCCAGCTGACATGTTAACCAAAGTGG  
TGACGGGTAGCAAGATTCAACATCACTTGGACTTGCTTCACATTAGTCCGTGTTGATATG  
CCTGATATGCCCGAGAGGGCATGGCCCTTCGGGGCGAGGTTGGAATGAGGTGGAGAGTAT  
ATGAAGGTGGAGGTGAACTACGGAGGCTTGATCCCGAGTTATGGGTACGTAGGCAATCAT  
GGTTTGAATGATGCAGCCAAGTTGGTGCTTGCTACTTCTTCTTGTGTTTCGTCCAAAATTT  
GAGGTCTATCAAATGATGTACGAGGTGGAGAATTGTGAGAAGAGGCTGCTGGTTTTCTGCT  
GCTGGTTTTTCTGGGGCGCACAAACGCCTAGAGTGGGCGCCAAGGCGCCCCGGTAGGCG  
ATAGATAGCCGACT

>Oec07|AJ620483.2|#RLC

CTCGGACGAAGCACATTGATGTCAGGTATATCATGTGCGTGATGTTATAGAGAAAGGTGT  
TATCACACTCTCGAAGGTACACACAAACGAGAACCCAGCTGACATGATAACCAAAGTGGT  
GACGGGTAGCAAGAATCAACATAACTCGGACTCGCTCCACATTAGACCGTGTGATATGC  
CTGATATGCCCGAGAGGGCACGGCCCTTCGGGGCGAGGTTTGAATGAGATGGAGAGTAT  
ATGAAGGTGGAGATGAACTACGGAGGCTTGATCCCGAGTTATGGGTACGTAGGCAATCAT  
GGTTTGAATGATGCAGCCAAGATGGTGCTTGCTACTTCTTCTTGTGTTTCGTCCAAAATTT  
GAGGTCTATCAAATGATGTACGAGGTGGAGAATTGTGAGAAGAGGCTGCTGGTTTTCTGCT  
GCTGGTTTTTCTGGGGCGCCAGGCGCCTGAAGTGAAGTACGCGCCTACGCGCCCCGGTAGGCT  
ATGTATAGCCATC

>Oec03|AJ536119.2|#RLC

ACGACAGGTAGTGGCAGAACAATTGATATTGTTGGAGAAGATTCACACTGAGAAAAATTC  
AGTTGATATGATGACAAAGGTTGTGACTAGAGAAAAGTTTTGAACTTTGTGCCGCACTGGT  
CAGCATAGATTCTAACTAATCTGTTAGATGATAATATCCTTCTTCAATGGGTTGGAGGAG  
GAGATTGTTATACGGGCTTGCTAGCCCATGATGGAAAAAGCCCAATCTTCTTTATTTTT  
AATTTAGGTCAACAAAAGTGGCCACACACACATTAATAATCGTGGCTGGTTGTGCGAGAA  
AGAGGCCAAAAACAAGGACTGTTGTGAAGCAATTAATAACTGTGGTTGCTATATTCATATG

GAAAAATGTTGACTAGGAAAAAGATAAAAAGAAGAAGAAAACCTGGCTGCTCAAAAAAGAA  
AAATAATTGGAAGGGAAGTGTATTTATTTATTTAATTTTTTCAATCTTTAGGTGTGGGT  
TCCCAAAGGTCTCTCT

>Oec10|AJ620488.2|#RLC

ACGACAGGTAGTGGCAGAACAATAGACATTGTTAAGAAGATACATAAAGAGAAGAATCCA  
ATAGATATGATGACAAAGGTAGTGACCAACCAAAGCTTGAGCTTTGAGCCAGACTGGCC  
GGCATGAATTCAACTAATTTGTTAAAGCATAGTCTCCTTCCTTAGTGGGCCGGAGGGGG  
AGATTGTTATATGGGCTAACTTGGTCCAGCCCATGATGAAGACTGGCCCAAGCCAATATA  
TTATTTAATTAAGTCTCA

>Oec09|AJ620487.2|#RLC

ACGACAGGTAGTGGCAGAACAATAGAAATGTTAAGAAGACACATAAAGAGAAGAATCCA  
ATAGATACGATGACAAAGGCAGTGATCAACCAAAGCTAGAGCTTTGTGCCAGACTGGCC  
GGCATGAATTTAACTAATATGTTAAAGCATAGTCTCTTACTTAAGTGGGCTAAGGAAAAG  
ATTGTTATATGGGCTAACTCGGTCCAGCCCATGATGAAGACTGGCCCAAGCCAATATAT  
ATTTAATTAAGTTCTCACGCA

>Oec08|AJ620484.2|#RLC

ACGACAGGTAGTGGCAGAACAATAGATATTGTTAAGAAGATTCATAAAGAGAAGAATCCA  
ATAGATATGATGACAAAGGATGTGACCAACCAAAGCTTGAGCTTTGTGCCAGACTGGCC  
GGCATGAATTCCTAACTAATTTGTTAAAGCATAGTCTCCTTCCTTAGTGGGCTGGAGGGGG  
AGATTGTTATATGGGCTAACTTGGTCCAGCCCATGATGAAGACTGGCCCAAGCCAATATA  
TTATTTAATTAAGTCTCAC

>Toe15|AJ416432.1|#RLC

CACTGCGTTTCCTGCATGGGGACTTGGATGAGGAGATCTATATGCATCAACTTGAGGGCT  
ACAAGGTTGAGGATAAGGAACGTCAGGTATGTCGCTTGAGAATGATCTATATGGATTGA  
AGCAATCTCCTCGGCAGTGGTACAAGCGATTTGACTCCTTCATGCTAAAGCATGGTTTCT  
CCAGAAGTGAGTATGACTGTTGTGTTTATATTCAAAACTTCGGGAAGGTAAGTATATCT  
ATCTTTTTTTGTATGTAGATGACATGAT

>OeTaq178|AJ297958.1|#tandem\_repeat

AAAGAATGAGCACTTTTATATTTGGAACGCTTGGATAGTCGGCGTGCGAAGAATTGAGCG  
TAACTTTTGCACACGGCGTCCGTTTTGGGCCATAAGTACTTTTTGGAAATGTAGCGACC  
GTTTTGGATTGAACTCACAACTTCTTCGTGACGTTTCGAGGGATTTTCGACCATTTTTTCG

>OeGEM86|AJ297959.1|#tandem\_repeat

TTTGTTTCGTTTTTTGGCGAATTGCTAGTCTAATTCGATTGGAATCGAGCCAATGAAAAGAG  
ATTTTTGATTCATGATAACTTCGGG

>OeTaq80|#tandem\_repeat

GACAGGTTGATCGGGAACAAAATCGCGCCGGGGCAATTCGTCATTTTTCTCGACTGT  
GTCGGAATTGGCTCAAATTT

>actin mRNA|AY788899.1|#actin

CTGGCTGGTCGTGACCTTACTGATCACTTGTGAAAATCCTCACAGAGCGTGGTTACTCT  
TTCACCACCTCTGCAGAGCGGGAAATTGTGAGAGACATGAAAGAAAAGTTAGCTTACATT  
GCCCTTGACTATGAGCAGGAGCTTGAGACTTCAAAAAGTAGCTCTTCTGTGGAGAAGAGC  
TACGAGTTGCCTGATGGGCAGGTTATTACCATTGGCGCTGAGCGTTTTTCGATGTCCTGAG  
GTTCTTTACCAGCTTCAATGATCGGAATGGAAGCAGCAGGCATTACGAAACCACATAC  
AACTCCATCATGAAGTGTGATGTGGATATTAGGAAGGACCTATACGGTAATATTGTACTT  
AGTGGCGGTTTCGACCATGTTCCAGGTATTGCTGACAGAATGAGCAAGGAAATTACAGCG

CTAGCTC

>rDNA|AJ865373.1|#rDNA

GAATTCACCAAGTGTGGATTGTTACCCACCAATAGGGAACGTGAGCTGGGTTTAGACC  
GTCGTGAGACAGGTTAGTTTTACCCTACTGATGACAGTATCGCAATAGTAATTCAACCTA  
GTACGAGAGGAACCGTTGATTCGCACAATTGGTCATCGCGCTTGGTTGAAAAGCCAGTGG  
CGCGAAGCTACCGTGCCTGGATTATGACTGAACGCCTCTAAGTCAGAATCCGGGCTAGA  
AGCGATGCGCGCACCCGCGTCCGCTTGGCCAGCCGAGTAGGGGCTTACGGCCCCCAG  
GGGCACATGTCGTTGGCCAAGCCCTCGCAGCGGACGTGCTGCGTTGGCCGCTTGAAGTA  
CAATTTCCATCGAGCGGCGGGTAGAATCCTTTGCAGACGACTTAAATACGCGACGGGGTA  
TTGTAAGCGGCAGAGTGGCCTTGCTGCCACGATCCGCTGAGATTCAGCCCTTTGTGCTC  
CGATTCGTCCCTCCCTTCCGTTCCCTCCCAATCTAAATCTTCTCTATCCGAAAATGCACT  
GAGGCTAGAACGCCCATGGTCCTTGAACAACCTTTTCTTTTCAATGCCCAAGTGTGGAGG  
GACAAAAACCCATGTACAGCAAAGCGTAGCATCCGTAGCTGTTACCAGCCTCTGCGCTAG  
AGTTCATGCAGTGGACATAAAAATATGTGATGTTTGGGTGCTCGATCTGTGCGCCTTGGTAT  
GACTGTGATATGCCTTTGGGTACTTGTGATATGCCTTCGTGCTCCTGCATTGTACTTGAG  
TTGCTCCATTATTGTGCATGCGACGTCCATCAGTTGCGCAATGCGGAATTCGGATGCATG  
AGATGTCCCTTAACATGCCTGGTGTGCCTGCGATTAGCATAAGCACACGGTGGCCAGAAT  
TGCCTGAAAATCAGGCTGCGTCCCTGCGGTGGCCAGGACGCGTCCCGGACATGGCCTGCA  
CACGGTGGCCAGAATTGCCTGAAAATCAAGCTGCGTCCCTGCGGTGGCCAGGACGCGTCC  
CGGACAAGGCTGCACACGGTGGCCAGAATTGCCTGAAAATCAGGCTGCGTCCCTGCAGT  
GGTCAGGACGCGTCCCTAGACATGGCCTGCACACCGTACACAGAACTGCCCAGAATTGCC  
TGAAAATCAGGCTGCGTCCCTGCAGTGGCCAGGACGCGTCCCGGACATGGCATGTCCCTG  
CAGTGGCCAGAATTGCCTGAAAATCAGGCTGCGTCCCTGCAGTGGCCAGGACGCGTCCCG  
AACATGGCCTGCACACGGTGGCCAGAATTGCCTGAAAATCAGGCTGCGTCCCTGCGGTGG  
CCAGGACGCGTCCCGGACATGGCCTGCACACGGTGGCCAAAATTGCCTGAAAATCAGGCA  
GCGTCCCTGCAGTGGTTCAGGACGCGTCCCGGACATGGCCTGCACACCGTGCACAGAACT  
GCCCAGAATTGCCTGAAAATCAGGCTGCGTCCCTGCAGTGGCCAGGACGCGTCCCGGACA  
TGGCCTGCACTCGGTGCCAGAATTGCCTAAAATCAGGCTGCGTCCCTGCCGTGGCCAG  
GACGCGTCCCGACATGGCCTGCACACGGTGGCCAGAATTGCCTGAAAATCAAGCTGCGT  
CCCTACGGTGGCCAGGACGCGTCCCGGACATGGCCTGCACACGGTGGCCAGAATTGCCTG  
AAAATCAGGCTGCGTCCCTGCGGTGGCCAGGACGCGTCCCGGACATGGCCTGCACACGGT  
GCCCAGAATTGCCTGAAAATCAGGCTGCGTCCCTGCCGTGGCCAGGACGCGTCCCGGACA  
TGGCCTGCACACGGTGGCCAGAATTGCCTGAAAATAAGGTTGCGTCCCTGCCGTGGTTCAG  
GACGTGTCCCGGACATGGCCTGCACACGGTGGCCAGAACTGCCCAGAATTGCCTGAAAA  
TCAGGCTGCGTCCCTGCAGTGGCCAGGACGCGTCCCGGACATGGCCTGCACTCGGTGCC  
AGAATTGCCATAAAAATCAGGCTGCGTCCCTGCCGTGGCCAGGACACGTCCCGGACATGGC  
CTGCACACGGTGGCCAGAATTGCCTGAAAATCAAGCTGCGTCCCTGCGGTGGCCAGGACG  
CGTCCCGGACATGGCCTGCACACGGTGGCCAGAATTGCCTGAAAATCAGGCTGCGTCCCT  
GCGGTGGCCAGGACGCGTCCCGGACATGGCCTGCACACGGTGGCCAAAATTGCCTGAAAA  
TCAGGACGCGTCCCTGCAGTGGTTCAGGACGCGTCCCGGACATGGCCTGCACACCGTGCAC  
AGAACTGCCCAGAATTGCCTGAAAATCAGGCTGCGTCCCTGCAGTGGCCAGGACGCGTC  
CCGGACATGGCCTGCACTCGGTGCCAGAATTGCCTAAAATCAGGCTGCGTCCCTGCCG  
TGGCCAGGACGCGTCCCGGACATGGCCTGCACACGGTGGCCAGAATTGCCTGAAAATCAA  
GCTGCGTCCCTGCGGTGGCCAGGACGCGTCCCGGACATGGCCTGCACACGGTGGCCAGAA  
TTGCCTGAAAATCAGGCTGCGTCCCTGCCGTGGCCAAGACGCGTCCCGGACATGGCCTGC  
ACACGGTGGCCAGAATTGCCTGAAAATAAGGCTGCGTCCCTGCCGTGGTTCAGGACGTGTC  
CCGGACATGGCCTGCACACGGTGGCCAGAATTGCCTGAAAATTAGGCTGCGTCCCTGCAG  
TGGCCAGGACGCGTCCCGGACATGGCCTGCACACCGTGCACAGAACTGCCCAAAATTGC  
CTGAAAATCTGGTTCGCTCCCTGCAGTGGCCAGGACGCGTCCCGGACATGGCCTGCACAC  
GGTGGCCAGAATTGCCTGAAAATCAGGCTGCGTCCCTGCCGTGGCCAGGACGCGTCCCGG  
ACATGGCCTGCACATGGTGGCCAGAATTGCCTGAAAATAAGGTTGCGTCCCTGCCGTGGT  
CAGGACGTGTCCCGGACATGGCCTGCACACGGTGGCCAGAATTGCCTGAAAATTAGGCTG

CGTCCCTGCAGTGGCCAGGACGCGTCCCGGACATGGCCTGCACACCGTGCACAGAACTG  
CCCAAAATTGCCTGAAAATCAAGCTGCGTCCCTGCAATGGCCAGGACGCGTCCCGGACAT  
GGCCTGCACACGGTGGCCAGAATTGCCTGAAAATCAGGCTGCGTCCCTGCCGTGGCCAGG  
ACGTGTCCCGGACATGGCCTGCACACGGTGGCCAGAATTGCCTGAAAATTAGGCTGCTTC  
CCTGCAGTGGCCAGGACGCGTCCCGGACATGGCCTGCACACCGTGCACAGAACTGCCCA  
GAATTGCCTGAAAATCGGGCTGCGTCCCTGCAGTGGCCAGGACGTGTCTGGACATGGCC  
TGCACACGGTGGCCAGAATTGCTTGAAAATCAGGCTGCGTCCCTGCAGTTGCCTGGACGT  
GTCCCGGACATGGCCAGCACACGGTGGCCAGAATTGCATGAAAATCAGGCTGCGTCCCTG  
CAGTGCCCGGACTCGTCCCGGACATGGCCTGCACACAGTGGCCAAAAATGCCTGAAAAT  
GAGGCTGCGTCCCTGCCGCGGCCAGGACACGTCCCGGACATGGCCTGCACTCGGTGCCCA  
TAAATGCCTGAAAATAAGCCTCGCGATATTTTATCGATGGATGGTTCGCGGAACCTAAG  
ATGATCGCTCGACAGAAGTTTATCGTTGGAATTTACTACATTTTCGAGTTGTTTCCACCGC  
ATTTACATTCCTCCCGCCCCCGTCCCTGTTTCCGGTCATGCATCAAAATACGTGTGAA  
TCGAAATTGTTTTCGACAAAAGAGCAATTGCTCCTCAAATATTTGATGATAACGAGCCTC  
CCGTGATTTTTGGGGATTTTTCCCGCTCCGTCTTCCATTTTTTCCGATTTTTCCCTATTT  
TTAATATTTTTTAAATAAAAAATAAAAATATTTTTTCGGTCGAAAATATTTTTTTCGAGA  
CCACATTCATCATACTTTCATCCCCAAAAAGAATTTTCCAAAAATCATCACCGAAAAT  
CCTACAGAAAATGGAAAAGAAATAGTATGATTCCTCAGCCCTTTGATATCTACTCCTGTC  
ACTTGGGTTTTTTCTCAGAACTTATTATAGGGGGGAGGTGGTGCATGAAAGGGAACAAG  
CAGCATGTGCAAGCTGCTGCAGGGAGCAACTGCCTACGGGTGGCTTGGCTCCCTGCAAAC  
TTCGGAGCCTTGGGGATCGGCACATGCCGGCCCCGGGCAAGTTTCCCGTCCGACGATGGTG  
CTGCTCCGGCGATACTCCGGCCGGTGACCCCCCGCAGCACCCGGACGGAACGCATGCGT  
GGGCACGAAATCGCGTTGCGCGTCGAGAGATGGCCTCGGATTTCCCGCAATTGCCTATT  
TCGGTCCAGAAACGGAGTAAAGACCCGACAAGAGTGGGAGGAACAATCCGGACGGAGGGC  
ATGCGCGGGGGCAAGAAACCGCGCGACGTGTGCATCGATTGGCCTAGGCATAAGACGCAC  
GTTGCAACGTAGTGCTCGCAACTTCCCAATGTCCGATCGGTTGGTACGAAATTGTCCCGA  
ATCGAGACCGTTCGTGAGGCACAACGATGCAGGACGGAGGGCATGCGTGGGGACGAAACCG  
CGCGGCGTGTGCATCGATTGGCCTAGGCATAAGACGCACGCTGCAACGTAGTCCCCGTAA  
CTTCCCAACGTCCGATCGGGAGGCGGAAATCGTTTCGAAACGAGACCGTCGAAAGGCAC  
GACGATGCAGGACGGAGGGCATGCGTGGGGACGAAACCGCGCGGCGTGTGGTTCGATTGG  
CCTAGGCATAAGACGCACGCTGCAACGCAGCTCTCGCGAATGCACTCCTTCCGATCGGGT  
TGCCTAAAAATCGATCGAAGCTCGTGCCTTGCATCCCGCGTTGCCTTTGGATCGTCTCGT  
GCTTCGTTTCGCACGACAGGAGGACCAAAACGTGGGCATCGAAGCAAGACGTTGCCGTGGG  
CGAGTGCCTACTGTGCCCTCGGGCGCGACGTGCGAGGCAACGCGTTTGGTGCTCGCAAT  
TGTGACTGTTCATCGAGTGCGAACCTCACGTTTCGACCCCTCGCCAACCGGGGCTTTCCGT  
CCGTGTGCGACTGCGAATCTCGATCTTCTCAAATAATCAGGCCGAAGCTAGATGCTTGGC  
GCCTGCGTTGGCTCGGCACCGGATGCTGCTCGTTCGCAAGACGGGAGGACCAGAATGTGG  
GCACCGAAAGAAACATTGTCGAGCGTGCGGCGTCCCCCGGGCGCGGCTCGCAGGACATTG  
CAGTAAGTGCTCGGACTGCGACCGTCATCGCACTGCGAACTTCGGCGGCACGATTCGGC  
CCCTTGCCAACGCAGGCCTCTCGCTCGTGTGCCCGGAAGTGCCGAATCCGTCTCGGTCT  
TCCCCGATCCATCCCTCGCTTGCTTCCCGTGGGGGGATAAGCAGAACGTCCGGCGCCGAAG  
AAAACGTTGTTGCAAGCGTGTGTGCCCCGGGGCACGACGTGTGGGCAACGCAGCGGG  
CGCTCACGATCGCGACCATCGTTCGCACGACAAAATTCGGTTCGGTTTCTCGATAATCTCCT  
ACCGTGCCTAGCGGGACATGCTCGGGCTCTGCTCGTTCGTTGTTGCGAACTTTCGGGT  
GGCGGACATGCGGTGCGCTCTGCTTGGGCATCGTGTACGTAAAGCACGTGAGTTGCGATC  
GGCGTGTTCGGGTACGTTGGATCCCTGCTCGGGCAGCGACAACGTTCCCTCACGCCCGT  
TCATTTGGGTGCTCGAATCTCGCGTTCGGTTCATCTCCGTCTCGGTTCCCTGTGCTGCATAC  
CCGTTGCGACGGCATCTCCATGCCAAAAAGACCCCGTTTCGCCCGAAGTCGCGCGTGAC  
AACC CGGATCGAAGGCTGAACCGAAAAGCACGCGTTCGCGTTCACCCCGTTTCGCAACACC  
AGGTGCGGGACTCGGGCCGCGACGTTCGCGCTCGAATTCTCGGATGCGGAACACCCAGCGG  
GTACGAGGACGCGGATCCTCCGATCACCCCGAACGAGCGTTCCGCGCTGCGTGCGAACG  
ACGTTCTTCTCGCCCCGGACCTCCGTCCGCGCGATGTTCGACGTGCAAGAGGAATGCTAC  
CTGTTGATCCTGCCAGTAGTCATATGCTTGTCTCAAAGATTAAGCCATGCATGTGTAAG

TATGAATTAATTCAGACTGTGAAACTGCGAATGGCTCATTAATCAGTTATAGTTTGTTT  
GATGGTACCTGCTACTCGGATAACCGTAGTAATTCTAGAGCTAATACGTGCAACAAACCC  
CGACTTCCGGAAGGGACGCATTTATTAGATAAAAGGTCGACGCGGGCTTCCGCCC GTTGC  
TGCGATGATTCATGATAACTCGACGGATCGCACGGCCCTCGTGCCGGCGACGCATCATT  
AAATTTCTGCCCTATCAACTTTCGATGGTAGGATAGTGGCCTACTATGGTGGTGACGGGT  
GACGGAGAATTAGGGTTCGATTCCGGAGAGGGAGCCTGAGAAACGGCTACCACATCCAAG  
GAAGGCAGCAGGCGCGCAAATTACCCAATCCTGACACGGGGAGGTAGTGACAATAAATAA  
CAATACCGGGCTCTCAGAGTCTGGTAATTGGAATGAGTACAATCTAAATCCCTTAACGAG  
GATCC
