# Supplementary material for: The Peculiar Landscape of Repetitive Sequences in the Olive (Olea europaea L.) Genome
Source: PubMed Central journal article supplement (PMC4007544; doi:10.1093/gbe/evu058), 2014-03-26
Supplement: supp_evu058_Barghini_et_al_SupplMat_S4.pdf [file supp_evu058_Barghini_et_al_SupplMat_S4.pdf]

Supplementary materials S4. Alignment of a sample of 20 assembled sequences of the olive whole genome database (numerical codes, below) to Sanger sequences from a small insert library (OEGA codes, above).

Query: OEGA1F17REV1  
 Subject: 152769

|              |      |                                                    |      |
|--------------|------|----------------------------------------------------|------|
| OEGA1F17REV1 | 4    | ATTCGTTATATTTATCAATTCGTCCTCACATTTAAAATTTTGTACTTCA  | 53   |
|              |      |                                                    |      |
| 152769       | 644  | ATTCGTTATATTTATCAATTCGTCCTCACATTTAAA-TTTGTACTTCA   | 692  |
| OEGA1F17REV1 | 54   | AGATTTTCCTCATTGCTCCATAACTCTACAATCCTATCTCCACCCCTGC  | 103  |
|              |      |                                                    |      |
| 152769       | 693  | AGATTTTCCTCATTGCTCCATAACTCTACAATCCTATCTCCACCCCTGC  | 742  |
| OEGA1F17REV1 | 104  | TTGGAGTTAACACTGAATGCAAGATTATGCAAACTATTTACTTCTCTCA  | 153  |
|              |      |                                                    |      |
| 152769       | 743  | TTGGAGTTAACACTGAATGCAAGATTATGCAAACTATTTACTTCTCTCA  | 792  |
| OEGA1F17REV1 | 154  | GGATTTTAAATGATAAATCACTAGAAATATTCGTGAAGAACAATTACAAA | 203  |
|              |      |                                                    |      |
| 152769       | 793  | GGATTTTAAATGATAAATCACTAGAAATATTCGTGAAGAACAATTACAAA | 842  |
| OEGA1F17REV1 | 204  | TGCTAGAGAACAAAGATTGCAATTGCACCATAAGTTTCTTCCTGGTTTTG | 253  |
|              |      |                                                    |      |
| 152769       | 843  | TGCTAGAGAACAAAGATTGCAATTGCACCATAAGTTTCTTCCTGGTTTTG | 892  |
| OEGA1F17REV1 | 254  | GTTAGACACTTGTACCGCAGCAAAGATTAATTGTAACCAATTCAATTTTT | 303  |
|              |      |                                                    |      |
| 152769       | 893  | GTTAGACACTTGTACCGCAGCAAAGATTAATTGTAACCAATTCAATTTTT | 942  |
| OEGA1F17REV1 | 304  | GAATTGTCTGCACCTATGCATAGCTTGAATAAGGGCATCAATCCTCTATA | 353  |
|              |      |                                                    |      |
| 152769       | 943  | GAATTGTCTGCACCTATGCATAGCTTGAATAAGGGCATCAATCCTCTATA | 992  |
| OEGA1F17REV1 | 354  | GTGTCTCTGCATTTTTACTAGTAATGGTGAGAGTGAGCACTAGCAACACT | 403  |
|              |      |                                                    |      |
| 152769       | 993  | GTGTCTCTGCATTTTTACTAGTAATGGTGAGAGTGAGCACTAGCAACACT | 1042 |
| OEGA1F17REV1 | 404  | ATTGTCTGTTTAACTGAGAGGTTAACAAATTTCCAGACAAAAATAACC   | 453  |
|              |      |                                                    |      |
| 152769       | 1043 | ATTGTCTGTTTAACTGAGAGGTTAACAAATTTCCAGACAAAAATAACC   | 1092 |
| OEGA1F17REV1 | 454  | TTGTACGATAACTATTTATCATCCTTCACTCCAATAACCAATATTTTATG | 503  |
|              |      |                                                    |      |
| 152769       | 1093 | TTGTACGATAACTATTTATCATCCTTCACTCCAATAACCAATATTTTATG | 1142 |
| OEGA1F17REV1 | 504  | TTGTACGACAATCATAATTATCATGATGTTTTTA-TTGACTACTGGTTGG | 552  |
|              |      |                                                    |      |
| 152769       | 1143 | TTGTACGACAATCATAATTATCATGATGTTTTTATTTGACTACTGGTTGG | 1192 |
| OEGA1F17REV1 | 553  | AATTTTGACTTTGATCACTTTGTACGGTAGGAAACATGCAGATTTTAAT  | 602  |
|              |      |                                                    |      |
| 152769       | 1193 | AATTTTGACTTTGATCACTTTGTACGGTAGGAAACATGCAGATTTTAAT  | 1242 |
| OEGA1F17REV1 | 603  | AGTGAATGTCTAAAAATTCAACAAAGCTCATGGAGTAAAGCTTGGTTTCT | 652  |
|              |      |                                                    |      |
| 152769       | 1243 | AGTGAATGTCTAAAAATTCAACAAAGCTCATGGAGTAAAGCTTGGTTTCT | 1292 |

|              |      |                                                    |      |
|--------------|------|----------------------------------------------------|------|
| OEGA1F17REV1 | 653  | GCATTGATTCCTGAACAT-AAAAAACAGAAGACTTTAAGCCTTGCATGTT | 701  |
| 152769       | 1293 |                                                    | 1342 |
| OEGA1F17REV1 | 702  | CGAGTACATTCACGACAAACTCTCCTGTTTAAATACACATTCATGTTCTT | 751  |
| 152769       | 1343 | .                                                  | 1392 |
| OEGA1F17REV1 | 752  | AAGTTCATATAAATATCACAAGTATAAAGGAGACACTAAGACCACTTTGT | 801  |
| 152769       | 1393 |                                                    | 1442 |
| OEGA1F17REV1 | 802  | ACACAGAACAAAAATCGACTATCCGATCCACCATGT               | 837  |
| 152769       | 1443 |                                                    | 1478 |

Query: OEGA1009FOR1  
Subject: 83744

|              |     |                                                     |     |
|--------------|-----|-----------------------------------------------------|-----|
| OEGA1009FOR1 | 2   | GAGCTTGTATCAACACTGATATGGCAAAATATAATCGGACTTTTTTTTATT | 51  |
| 83744        | 60  |                                                     | 109 |
| OEGA1009FOR1 | 52  | TCTTTTTTCCATCTTCCAATGATATCGCGTCATATGTTGTATGTAAGAT   | 101 |
| 83744        | 110 |                                                     | 158 |
| OEGA1009FOR1 | 102 | TTTTCTATAAAAAAATCTGTACCTATGACATTGTTCTAATCCTATACAA   | 151 |
| 83744        | 159 |                                                     | 208 |
| OEGA1009FOR1 | 152 | TGCTATATAATCCAGAATTAACAATCACTAAAGCCTATATTCCACTCAGC  | 201 |
| 83744        | 209 |                                                     | 258 |
| OEGA1009FOR1 | 202 | TTAGTAGATCCAACAGCTATAAATTGACAATTAGTAGATCCTATTACAAC  | 251 |
| 83744        | 259 |                                                     | 308 |
| OEGA1009FOR1 | 252 | TCTACGACATTATGTTTATTTTGAATTTGAAGTTTGATTAGGACTAACC   | 301 |
| 83744        | 309 |                                                     | 358 |
| OEGA1009FOR1 | 302 | ATTTTGTACGGATGTAGCTAGGGTTTTTGTAGAAATGTTTTTAGGGTTAT  | 351 |
| 83744        | 359 |                                                     | 408 |
| OEGA1009FOR1 | 352 | TATGAATGTACAGTTCTTACAACCTCCTCACATGAAGGGACCGTCATGCA  | 401 |
| 83744        | 409 |                                                     | 458 |
| OEGA1009FOR1 | 402 | TGCTGTACACAAAGTGTATAGCAAGCATGATTCACGTTTTTATCATATTC  | 451 |
| 83744        | 459 | .                                                   | 508 |
| OEGA1009FOR1 | 452 | AGTTTTGCTTCTTGTACGAAGGAAATCTTGCCAAATGTTTTACAGGTGCC  | 501 |
| 83744        | 509 | .     .                                             | 558 |
| OEGA1009FOR1 | 502 | GATTGGTTACTCTTTAACCTTTGACGAATGAAAAATTTCCAATTGTATC   | 551 |
| 83744        | 559 |                                                     | 608 |

|              |     |                                                     |     |
|--------------|-----|-----------------------------------------------------|-----|
| OEGA1009FOR1 | 552 | TATAAATAATCTAATAGTACTTTATTCTGTACATGTAGTACTGCCCTATC  | 601 |
| 83744        | 609 | TATAAATAATCTAATAGTACTTTATTCTGTACATGTAGTACTGCCCTATC  | 658 |
| OEGA1009FOR1 | 602 | ATGTTTTGGTCAAACACAAGTTTGTGATCTAATTTATACTTATCGCAGCC  | 651 |
| 83744        | 659 | ATGTTTTGGTCAAACACAAGTTTGTGATCTAATTTATACTTATCGCAGCC  | 708 |
| OEGA1009FOR1 | 652 | TTCAGTACATAATTCAAAGTGCACGACAAAATGTGATGTATATGTCATGT  | 701 |
| 83744        | 709 | TTCAGTACATAATTCAAAGTGCACGACAAAATGTGATGTATATGTCATGT  | 758 |
| OEGA1009FOR1 | 702 | CATATCAAATCATTTTTTGCACGCCAGACTAGGAGACCAATTTAGCAGCCC | 751 |
| 83744        | 759 | CATATCAAATCATTTTTTGCACGCCAGACTAGGAGACCAA-TTAGCAGCCA | 807 |
| OEGA1009FOR1 | 752 | ATATTTTTGCACTTCTGAAAAACATTCCACAACCTTGATTGGATCTTAGAA | 801 |
| 83744        | 808 | ATATTTTTGCACTTCTGAAAAACATTCCACAACCTTGATTGGATCTTAGAA | 857 |
| OEGA1009FOR1 | 802 | ACTTGTTT-CACTTCCACCCAAAAAACAAGATTTTTCTCAAATAAAG     | 850 |
| 83744        | 858 | AC-TGTTTCCACTTCCAAACCCAAAAAACAAGA-TATTCTCAAATAAAG   | 905 |
| OEGA1009FOR1 | 851 | AGTGATT-CACT-ACTTGTTTAACTTTAAATGATGATG-AAAGATGTGAG  | 897 |
| 83744        | 906 | AGTGATTCCACTAACTTGTTTAACTTTAAATGATGATGAAAAGATGTGAG  | 955 |
| OEGA1009FOR1 | 898 | ATTGTTG                                             | 904 |
| 83744        | 956 | ATTGTTG                                             | 962 |

Query: OEGA1P06REV1  
Subject: 17720

|              |     |                                                     |     |
|--------------|-----|-----------------------------------------------------|-----|
| OEGA1P06REV1 | 1   | GTTGTCTGCATGTGATTTCAATTTATATTTTACGTTTGTGCTTGCTGGTT  | 50  |
| 17720        | 24  | GTTGTCTGAATGTGATTTCAATTTATATTTTACGTTTGTGCTTGCTGGTT  | 73  |
| OEGA1P06REV1 | 51  | ATACTAGGAGCAGACAAAATGTATGAATGCTAGCTCATGCTATATACAGT  | 100 |
| 17720        | 74  | ATACTAGGAGCAGACAAAATGTATGAATGNTAGCTCATGCTATATACAGT  | 123 |
| OEGA1P06REV1 | 101 | CCAAAAATAAATTTTTCATAGTTGGCATCAGGAAATATTACTTGGTGGAC  | 150 |
| 17720        | 124 | CCAAAAATAAATTTTTCANAGNTGGCATCAGGAAATATTACTTGGTGGAC  | 173 |
| OEGA1P06REV1 | 151 | TCCTATTTTTCTCATCGACCAATATATATGGCCTCGTACAAAGGTTTAGA  | 200 |
| 17720        | 174 | TCCTATTTTTCTCATCGACCAATATATATGGCCNCGTACAAAGGTTTAGA  | 223 |
| OEGA1P06REV1 | 201 | CGTACTGTATCACTTCCAACCTGCTTTTTGACAAACAAATAGGTCGGCGCC | 250 |
| 17720        | 224 | CGTACTNTATCACTTCCAACCTGNNTTNGACAAACAAATAGGTCGGCGCC  | 273 |
| OEGA1P06REV1 | 251 | ATAGATTTAGGAATGCTCTTGAGAGGTTCAACTTCAAAGACTCTTTGTGC  | 300 |
| 17720        | 274 | ATAGATTTAGGAATGCTCTTGAGAGGTTCAACTTCAAANACTCTTTGTGC  | 323 |
| OEGA1P06REV1 | 301 | AGGAACATGATCGAGCGTGCATTTAGTGTGTTGAAGTAGAGATGGAAAAT  | 350 |
| 17720        | 324 | AGGAACATGATCGAGCGTGCATTTAGTGTGTTGAAGTAGAGATGGAAAAT  | 373 |

|              |     |                                                     |     |
|--------------|-----|-----------------------------------------------------|-----|
| OEGA1P06REV1 | 351 | CTTGAATCGTATGCCCAGCCACTCTTTTCCAACACAAGTTGCAGTTGTCA  | 400 |
|              |     |                                                     |     |
| 17720        | 374 | CTTGAATCGTATGCCCAGCCACTCTTTTCCAACACAAGTTGCAGTTGTCA  | 423 |
| OEGA1P06REV1 | 401 | TAGT---GGGTATTTATAATTTTTGCATCATTCTGGATTTGTTGACAAGA  | 447 |
|              |     |                                                     |     |
| 17720        | 424 | TAGTGGGGGGTATTTATAATTTTTGCATCATTCTGGATTTGTTGACAAGA  | 473 |
| OEGA1P06REV1 | 448 | AGTTCGCAAGAGCAGAAATAGATGACAAGGTAGCCAAAGCGGAGCTACCT  | 497 |
|              |     |                                                     |     |
| 17720        | 474 | AGTTCGCAAGAGCAGAAAT-GATGACAAGGTAGCCAAAGCGGAGCTACCT  | 522 |
| OEGA1P06REV1 | 498 | ACTGTTGAGGATGAAATTTAGGCCGAAATGAATGCGTCGGACATAACAACA | 547 |
|              |     |                                                     |     |
| 17720        | 523 | ACTGTTGAGGATGAAATTTAGGCCGAAATGAATGCGTCGGACATAACAACA | 572 |
| OEGA1P06REV1 | 548 | AAGTGAGTGGGATAGGTTTCGCGATTACATGGCACAACAACCATGATCAT  | 597 |
|              |     |                                                     |     |
| 17720        | 573 | AAGTGAGTGGGATAGGTTTCGCGATTACATGGCACAACAACCATGATCAT  | 622 |
| OEGA1P06REV1 | 598 | CGCTTCTAGGAACCTCGCATCCAGTACCTATGTATTGGTATGAAGGAACT  | 647 |
|              |     |                                                     |     |
| 17720        | 623 | CGCTTCTAGGAACCTCGCATCCAGTACCTNTGTATTGGTATGAAGGAACT  | 672 |
| OEGA1P06REV1 | 648 | TTGCAAGTTTGAGTCAATGTATTTGTACACGTTGCGGTAGCTTTGTAAGT  | 697 |
|              |     | .                                                   |     |
| 17720        | 673 | NTGCAAGTTTGAGTCAATGTATTTGTACACGTTGCGGTAGCTTTGTAGGT  | 722 |
| OEGA1P06REV1 | 698 | GTGTTTTGATTATGTACGTCCGTGTAACATGAAATAATTGATTATGAAAT  | 747 |
|              |     |                                                     |     |
| 17720        | 723 | GTGTTTTGATTATGTACGTCCGTGTAACATGAAATAATTGATTATGAAAT  | 772 |
| OEGA1P06REV1 | 748 | TTGCAGCATGAATTGGGACTTTGGGGACCGACGACGCAGTGACTATTGTA  | 797 |
|              |     |                                                     |     |
| 17720        | 773 | TTGCAGCATGAATTGGGACTTTGGGGACCGANGACGCAGTGACTATTGTA  | 822 |
| OEGA1P06REV1 | 798 | TCATTTTTTTCCAGTTCGAAGTCTTT                          | 824 |
|              |     |                                                     |     |
| 17720        | 823 | TCATTTTTTTCCAGTTCGAAGTCTTT                          | 849 |

Query: OEGA2C17FOR1  
Subject: 5818

|              |     |                                                    |     |
|--------------|-----|----------------------------------------------------|-----|
| OEGA2C17FOR1 | 1   | ATTATTGATTTGGACATCATCGATTATGTAACAATTAATTCTTTTGGTAC | 50  |
|              |     |                                                    |     |
| 5818         | 71  | ATTATTGATTTGGACATCATCGATTATGTAACAATTAATTCTTTTGGTAC | 120 |
| OEGA2C17FOR1 | 51  | TTGCTGAAGATTGTATTTGAAAATGCAATTCTCTTGGATCTTGGATTATA | 100 |
|              |     |                                                    |     |
| 5818         | 121 | TTGCTGAAGATTGTATTTGAAAATGCAATTCTCTTGGATCTTGGATTATA | 170 |
| OEGA2C17FOR1 | 101 | AATCCTCATTATCTTAGGACTATTTTGGAAATCTTACCGTGAGATTAAT  | 150 |
|              |     |                                                    |     |
| 5818         | 171 | AATCCTCATTATCTTAGGACTATTTTGGAAATCTTACCGTGAGATTAAT  | 220 |
| OEGA2C17FOR1 | 151 | ACAAGTTTTGTGTTATTCATATGTGCTAATCAAGATTTAGCACGAGCTGT | 200 |
|              |     |                                                    |     |
| 5818         | 221 | ACAAGTTTTGTGTTATTCATATGTGCTAATCAAGATTTAGCACGAGCTGT | 270 |
| OEGA2C17FOR1 | 201 | GTGACAAAATTCAAATCAGAGTAGAAGTTAGAGGTGCCAAGATGAGTTGA | 250 |
|              |     |                                                    |     |
| 5818         | 271 | GTGACAAAATTCAAATCAGAGTAGAAGTTAGAGGTGCCAAGATGAGTTGA | 320 |

|              |     |                                                          |     |
|--------------|-----|----------------------------------------------------------|-----|
| OEGA2C17FOR1 | 251 | ACAGTCTGTGACCTGAGTTCTAACCCCTTTAAATAGTTGATAAAAATGTGTT     | 300 |
| 5818         | 321 | <br>ACAGTCTGTGACCTGAGTTCTAACCCCTTTAAATAGTTGATAAAAATGTGNT | 370 |
| OEGA2C17FOR1 | 301 | ACTGAATAATTGATTA-AAATTGTAGATTCAATGAAATGTGTGAAAAAAT       | 349 |
| 5818         | 371 | <br>ACTGAATAATTGATTAGAAAATTGTAGATTCAATGAAATGTGTGAAAAAAT  | 420 |
| OEGA2C17FOR1 | 350 | GCATTTTTAGAAATTGAGGACCAAACAGAAGTTTCAATTTCCATTTTCAGAT     | 399 |
| 5818         | 421 | <br>GCATTTTTAGAAATTGAGGACCAAACAGAAGTTTCAATTTCCATTTTCAGAT | 470 |
| OEGA2C17FOR1 | 400 | ACATGAGTTAATTGTCTCAATGTTTACTGAACTTGCATCTGTATTCAATT       | 449 |
| 5818         | 471 | <br>ACATGAGTTAATTGTCTCAATGTTTACTGAACTTGCATCTGTATTCAATT   | 520 |
| OEGA2C17FOR1 | 450 | ATTCATTGAAGTTTATGACGTCAAGTTTTAGCCACAAAATTTATCAAAC        | 499 |
| 5818         | 521 | <br>ATTCATTGAAGTTTATGACGTCAAGTTTTAGCCACAAAATTTATCAAAC    | 570 |
| OEGA2C17FOR1 | 500 | ATTACTTACCGACATAACAGCCATTTCAAATCGATTTAGTGACGTGACTA       | 549 |
| 5818         | 571 | <br>ATTACTTACCGACATAACAGCCATTTCAAATCGATTTAGTGACGTGACTA   | 620 |
| OEGA2C17FOR1 | 550 | ACGGAATGCACATGTGGCGTCCCATCACGCAATTCACAAATTGTCACATA       | 599 |
| 5818         | 621 | <br>ACGGAATGCACATGTGGCGTCCCATCACGCAATTCACAAATTGTCACATA   | 670 |
| OEGA2C17FOR1 | 600 | TTCAATTGCTCATTAAATTTTGAAAACATCTTCGATTGCTCATTGAACT        | 649 |
| 5818         | 671 | <br>TTCAATTGCTCATTAAATTTTGAAAACATCTTCGATTGCTCATTGAACT    | 720 |
| OEGA2C17FOR1 | 650 | TTAAGACGGTCAAATTTTGACCATTGAAAATTTAAAGCATCTTTTGTTGC       | 699 |
| 5818         | 721 | <br>TTAAGACGGTCAAATTTTGACCATTGAAAATTTAAAGCATCTTTTGTTGC   | 770 |
| OEGA2C17FOR1 | 700 | TCACCAAACCTTTGAAAACGTCTTTGATTGTTTACTGAACTTTTAAATGAT      | 749 |
| 5818         | 771 | <br>TCACCAAACCTTTGAAAACGTCTTTGATTGTTTACTGAACTTTTAAATGAT  | 820 |
| OEGA2C17FOR1 | 750 | CGAACTTTGGTTAATAAACTTATA                                 | 773 |
| 5818         | 821 | <br>CGAACTTTGGTTAATAAACTTATA                             | 844 |

Query: OEGA2E16FOR1  
Subject: 105150

|              |     |                                                               |     |
|--------------|-----|---------------------------------------------------------------|-----|
| OEGA2E16FOR1 | 1   | AAAAAATAATAATATAGAAATCCAAGAATATGAGGGAATAGAAGGTTATG            | 50  |
| 105150       | 539 | .     <br>AGAAAATAATAATATAGAAATCCAAGAATATGAGGGAATAGAAGGCTATG  | 588 |
| OEGA2E16FOR1 | 51  | GATTAAAGGTAACCTTTGATAATAATAAATTTAAGAAAATGCAAAAGCTA            | 100 |
| 105150       | 589 | .     <br>GATTAAAAGTAACTTTGATAATAATAAATTTAAGAAAATACAAAAGTTA   | 638 |
| OEGA2E16FOR1 | 101 | TCCTTGGATTTGAAAATAGGAAAATGGGAAATTTCTAGATAGAATATGGAG           | 150 |
| 105150       | 639 | .     <br>TCCTTAGATTTGAAAATAGGAAAATGGGAAATTTCTAGATAGAATATGGAG | 688 |
| OEGA2E16FOR1 | 151 | AAGAGAAAGAATAGCAATAAATGAATATCATAAGATTGAAAAAATATAG             | 200 |
| 105150       | 689 | .     <br>AAGAGAAAGAATAGCAATAAATGAATACCATAAGATTGAAAAAATATAG   | 738 |

|              |      |                                                     |      |
|--------------|------|-----------------------------------------------------|------|
| OEGA2E16FOR1 | 201  | ATGTTAGAACCACTCAAGGAACACATAAAAATAAATCTTTTAAACAAAAGT | 250  |
|              |      | .       .                                           |      |
| 105150       | 739  | ATGTTAGAACAACCTCAAGGAACACATAAAAATAAATCTTCTAACAAAAGT | 788  |
| OEGA2E16FOR1 | 251  | ACAGTATCAGAATTATTATCAAAAATAAGTAAAAAGCATAGTGAAAAGAT  | 300  |
|              |      | .       .                                           |      |
| 105150       | 789  | ACAGTATCAGAATTATTATCAAAAATAAGTAAAAAGCATAGTGAAAAGAT  | 838  |
| OEGA2E16FOR1 | 301  | CCAATATGTTTATTTAGCAGGAATACAAATAATGTTTAAATCATTATTTA  | 350  |
|              |      | .       .                                           |      |
| 105150       | 839  | CCAATATGTTTATTTAGCAGGAATACAAATAATGTTTAAATCATTATTTA  | 888  |
| OEGA2E16FOR1 | 351  | GAGAGGGAATAGATTCACCATTAACCGTAAGCTTACATGATGGAAGAATT  | 400  |
|              |      | .     .                                             |      |
| 105150       | 889  | GAGAGGGAATAGATTCACCATTAAGTGTAAAGTTTACATGATGGAAGAATT | 938  |
| OEGA2E16FOR1 | 401  | ATAAATCTTGAAGATGGTCATTTAGGAACTATAGAAGGAAATTTAGCATA  | 450  |
|              |      | .       .                                           |      |
| 105150       | 939  | ATAAATCTTGAAGATGGTCATTTAGGAACTATAGAAGGAAATTTAGCATA  | 988  |
| OEGA2E16FOR1 | 451  | CCAAAAGCTAATATTTACTTGTACCCAAAATATTGTGTCTCATTGAAAG   | 500  |
|              |      | .     .       .       .                             |      |
| 105150       | 989  | TCAAAAGTTAATATTTACTTGTACCCAAAATATTGTGTCTCATTAAAAG   | 1038 |
| OEGA2E16FOR1 | 501  | ATAAAAACTTTAAATGAAGTCTTAGGATTACATTTTAAATTACATAGAAAT | 550  |
|              |      | .       .       .                                   |      |
| 105150       | 1039 | ATAAAAATTTTAAATGAAGTCTTAGGATTACATTTCAAATTACATAGGAAT | 1088 |
| OEGA2E16FOR1 | 551  | GATATAATGGAACCAGGATACCAAATTATGACTATGGAATATAGGGCATT  | 600  |
|              |      | .       .                                           |      |
| 105150       | 1089 | GATATAATGGAACCAGGAGATCAAATTATGACTATGGAATATAGGGCATT  | 1138 |
| OEGA2E16FOR1 | 601  | ATATACATTTACTAATTCTAATTATGAAAATATTTATTCTAATAAACCAT  | 650  |
|              |      | .       .                                           |      |
| 105150       | 1139 | ATATACATTTACTAATTCTAATTATGGGAATATTTATTCCAATAAACCAT  | 1188 |
| OEGA2E16FOR1 | 651  | ATATAGAAATTCATAAAGAATGTAAGGATATTAGTAAGATTGTGGAACCA  | 700  |
|              |      | .       .       .       .                           |      |
| 105150       | 1189 | ACATAGAAATTCATAAAGAATGTAAGGATATTAGTAAAATAGTGNAACCA  | 1238 |
| OEGA2E16FOR1 | 701  | AACAAACAAATAAACCTTATCCCAGAAG-ATATGAATTTAATATAACTAA  | 749  |
|              |      | .       .       .                                   |      |
| 105150       | 1239 | AACAAACAAATAAATCTTATCCCAGAAGAATATGAATTTAATATAACTAA  | 1288 |
| OEGA2E16FOR1 | 750  | AAATAAGCTTGAAATAACAGAG                              | 771  |
|              |      | .                                                   |      |
| 105150       | 1289 | AAATAAGCCTGAAATAACAGAG                              | 1310 |

Query: OEGA2I17REV1  
Subject: 20023

|              |     |                                                    |     |
|--------------|-----|----------------------------------------------------|-----|
| OEGA2I17REV1 | 1   | ATTCAGTTGTTATTTGTGAGTTTTTTAGATTACTTCATCGACTATTGTGT | 50  |
|              |     | .       .                                          |     |
| 20023        | 829 | ATTCAGTTGTTATTTGTGAGTTTTTTAGATTACTTCATCGACTATTGTGT | 878 |
| OEGA2I17REV1 | 51  | TTATGTTGGCGCTCGTGGTGTATGAGCATTGCTTGTTCATTGCAGCATA  | 100 |
|              |     | .       .                                          |     |
| 20023        | 879 | TTATGTTGGCGCTCGTGGTGTATGAGCATTGCTTGTTCATTGCAGCATA  | 928 |
| OEGA2I17REV1 | 101 | TTTATTGTTTATTGGCCATACTTTGACCTTTAGCTTCTATTTATAGTGA  | 150 |
|              |     | .       .                                          |     |
| 20023        | 929 | TTTATTGTTTATTGGCCATACTTTGACCTTTAGCTTCTATTTATAGTGA  | 978 |

|              |      |                                                       |      |
|--------------|------|-------------------------------------------------------|------|
| OEGA2I17REV1 | 151  | TTTGCCAAC TGT TAGCAATATATGGAATTTGATATA CATGTTGAGGTTGA | 200  |
|              |      |                                                       |      |
| 20023        | 979  | TTTGCCAAC TGT TAGCAATATATGGAATTTGATATA CATGTTGAGGTTGA | 1028 |
| OEGA2I17REV1 | 201  | GCTGCTGATGTTAGCAAGATGGGCCTTCTTGGCCTCTGAATAATGTATTT    | 250  |
|              |      |                                                       |      |
| 20023        | 1029 | GCTGCTGATGTTAGCAAGATGGGCCTTCTTGGCCTCTGAATAATGTATTT    | 1078 |
| OEGA2I17REV1 | 251  | TTCATCCGCATGTTACTGGGAATGATTCATTACAATGAGCTGAATGGTTC    | 300  |
|              |      |                                                       |      |
| 20023        | 1079 | TTCATCCGCATGTTACTGGGAATGATTCATTACAATGAGCTGAATGGTTC    | 1128 |
| OEGA2I17REV1 | 301  | AAATGATAATAAGAATTACCCATTTAGGAAGTGC GTTATGATAAATCTTT   | 350  |
|              |      |                                                       |      |
| 20023        | 1129 | AAATGATAATAAGAATTACCCATTTAGGAAGTGC GTTATGATAAATCTTT   | 1178 |
| OEGA2I17REV1 | 351  | GATGCTTCTGGTTTTCTTTCTATGATTCGTGAATATTGCTGCTTGTTT      | 400  |
|              |      |                                                       |      |
| 20023        | 1179 | GATGCTTCTGGTTTTCTTTCTATGATTCGTGAATATTGCTGCTTGTTT      | 1228 |
| OEGA2I17REV1 | 401  | GTGAGCTGACTGCATTA AAAATTGAAAGTGTATCTTATCCATGAATTTGAA  | 450  |
|              |      |                                                       |      |
| 20023        | 1229 | GTGAGCTGACTGCATTA AAAATTGAAAGTGTATCTTATCCATGAATTTGAA  | 1278 |
| OEGA2I17REV1 | 451  | GTTGAAGCTACGCCGAAGCCTTTTTAACATAAAGGTGGTGAGGGAGAGGG    | 500  |
|              |      |                                                       |      |
| 20023        | 1279 | GTTGAAGCTACGCCGAAGCCTTTTTAACATAAAGGTGGTGAGGGAGAGGG    | 1328 |
| OEGA2I17REV1 | 501  | TTGGAGTTGGTGATAATGAGGAAAAGAAATGGAGTGAACCAGATTGCAC     | 550  |
|              |      |                                                       |      |
| 20023        | 1329 | TTGGAGTTGGTGATAATGAGGAAAAGAAATGGAGTGAACCAGATTGCAC     | 1378 |
| OEGA2I17REV1 | 551  | TGCTTGGGGGTTGATTGTTCAAGCTAATGAGTTTAGTCACACTGATGGTT    | 600  |
|              |      |                                                       |      |
| 20023        | 1379 | TGCTTGGGGGTTGATTGTTCAAGCTAATGAGTTTAGTCACACTGATGGTT    | 1428 |
| OEGA2I17REV1 | 601  | AAAATTCTCTTATGGGCAGCTCATGTT CATGACCCTAATTA AAAATTCTCT | 650  |
|              |      |                                                       |      |
| 20023        | 1429 | AAAATTCTCTTATGGGCAGCTCATGTT CATGACCCTAATTA AAAATTCTCT | 1478 |
| OEGA2I17REV1 | 651  | TATGGGCAGCTCTATTTATTATTT CATTGTTGAATAACTGCTGCTTCTCTT  | 700  |
|              |      |                                                       |      |
| 20023        | 1479 | TATGGGCAGCTCTATTTATTATTT CATTGTTGAATAACTGCTGCTTCTCTT  | 1528 |
| OEGA2I17REV1 | 701  | CTCTAGAATGTCC-TTTGTTTCCTGTCATTGTCTCCATGTGCTCATTAC     | 749  |
|              |      |                                                       |      |
| 20023        | 1529 | CTCTAGAATGTCC-TTTGTTTCCTGTCATTGTCTCCATGTGCTCATTAC     | 1578 |
| OEGA2I17REV1 | 750  | ATGGACTTAACTTACGGTAAATTTGGGAAATTGCAGATAGCAGCCCAAAG    | 799  |
|              |      |                                                       |      |
| 20023        | 1579 | ATGGACTTAACTTACGGTAAATTTGGGAAATTGCAGATAGCAGCCCAAAG    | 1628 |
| OEGA2I17REV1 | 800  | CTGAT-ACA-GATCAGCTGATGGATACTCCGGATATGTGGATGGTAAATT    | 847  |
|              |      |                                                       |      |
| 20023        | 1629 | CTGATAACAGGATCAGCTGATGGATACTCCGGATATGTGGATGGTAAATT    | 1678 |
| OEGA2I17REV1 | 848  | G-GAGA 852                                            |      |
|              |      |                                                       |      |
| 20023        | 1679 | GAGAGA 1684                                           |      |

Query: OEGA2K12FOR1  
Subject: 92871

|              |      |                                                     |      |
|--------------|------|-----------------------------------------------------|------|
| OEGA2K12FOR1 | 2    | TTTGATTAGTTGAACTTTCTCTAGTTTTCTTATAAAATTTTTCTCTTGTGG | 51   |
| 92871        | 393  | TTTGATTAGTTGAACTTTCTCTAGTTTTCTTATAAAATTTTTCTCTTGTGG | 442  |
| OEGA2K12FOR1 | 52   | TGTCACCTAATAATTTCTTTTCATTTATTTAGTCTCATGATACGTACATTA | 101  |
| 92871        | 443  | TGTCACCTAATAATTTCTTTTCATTTATTTAGTNTCATGATACGTACATTA | 492  |
| OEGA2K12FOR1 | 102  | ACTTTATATCTAGTTTTATTACATGTTTGTATCTTATTATTGCTTTGGT   | 151  |
| 92871        | 493  | ACTTTATATCTAGTTTTATTACATGTTTGTATCTTATTATTGCTTTGGT   | 542  |
| OEGA2K12FOR1 | 152  | ATAACTTAATTGCATGTTTTCATTTTTGCTTCTAATTTAGCAACTCTTAT  | 201  |
| 92871        | 543  | ATAACTTAATTGCATGTTTTCATTTTTGCTTCTAATTTAGCAACTCTTAT  | 592  |
| OEGA2K12FOR1 | 202  | GTTAAATTTTGATGTGTATTTGAACTTGTACATGGTGTGAAGGTACCGA   | 251  |
| 92871        | 593  | GTTAAATTTTGATGTGTATTTGAACTTGTACATGGTGTGAAGGTACCGA   | 642  |
| OEGA2K12FOR1 | 252  | TTTTACAATTTAGGCTACATGATCATTTTACACTACACTCTTTTCCTTAA  | 301  |
| 92871        | 643  | TTTTACAATTTAGGCTACATGATCATTTTACACTACACTCTTTTCCTTAA  | 692  |
| OEGA2K12FOR1 | 302  | ATAGATTCTTCTTCAAATCTGTTCAAATTGTTCTTAATGATGCTTATTC   | 351  |
| 92871        | 693  | ATAGATTCTTCTTCAAATCTGTTCAAATTGTTCTTAATGATGCTTATTC   | 742  |
| OEGA2K12FOR1 | 352  | AATCCCTGAATTGTGATTCTACTCTCAAATTTTATTTATAGATATGAATC  | 401  |
| 92871        | 743  | AATCCCTGAATTGTGATTCTACTCTCAAATTTTATTTATAGATATGAATC  | 792  |
| OEGA2K12FOR1 | 402  | CAGATGTGACAACAGCAGTTTCTATATTATCTCATGTTTGGACATCTACA  | 451  |
| 92871        | 793  | CAGATGTGACAACAGCAGTTTCTATATTATCTCATGTTTGGACATCTACA  | 842  |
| OEGA2K12FOR1 | 452  | TCATTATGGGTTTTGTTAATGCTACTTCTTCGAACAGTAGAGCATAGCAT  | 501  |
| 92871        | 843  | TCATTATGGGTTTTGTTAATGCTACTTCTTCGAACAGTAGAGCATAGCAT  | 892  |
| OEGA2K12FOR1 | 502  | AAATGTTTATTTATGTAAAATTTTCAGTTATCAATTTTGATGGTTTATCTA | 551  |
| 92871        | 893  | AAATGTTTATTTATGTAAAATTTTCAGTTATCAATTTTGATGGTTTATCTA | 942  |
| OEGA2K12FOR1 | 552  | CGTGACAGTAACAGTCTGTTTTGGGTGGTTCCGCCAGGATGCTGAGGAGC  | 601  |
| 92871        | 943  | CGTGACAGTAACAGTCTGTTTTGGGTGGTTCCGCCAGGATGCTGAGGAGC  | 992  |
| OEGA2K12FOR1 | 602  | ATCAAGCACCTATTTCTGGTCTTGGAGAAGTTGGTCCATCCAGTCAGTCC  | 651  |
| 92871        | 993  | ATCAAGCACCTATTTCTGGTCTTGGAGAAGTTGGTCCATCCAGTCAGTCC  | 1042 |
| OEGA2K12FOR1 | 652  | AAATTACTTGTGAACAGGGATGAAAGCCATGTGAGGAATGAAGTAAATCT  | 701  |
| 92871        | 1043 | AAATTACTTGTGAGCAAGGATGAAGGCCATGTGAGGAATGAAGTAAATCT  | 1092 |
| OEGA2K12FOR1 | 702  | TAAT-AAAATTCATCAAAAATATTACATGTTGATCAGATCAACCAGAAGA  | 750  |
| 92871        | 1093 | TAATAAAAATTCATCAAAAATATTACATGTTGATCAGATCAACCAGAAGA  | 1142 |



|              |      |                                                    |      |
|--------------|------|----------------------------------------------------|------|
| OEGA2K12FOR1 | 751  | CAAGTGTAGATGTCACCAAGC-AGGATGTGAAGATGTT-CCTATGTGAAG | 798  |
|              |      |                                                    |      |
| 92871        | 1143 | CAAGTGTAGATGTCACCAAGCAAGGATGTGAAGATGTTCCCTACGTGAAG | 1192 |
| OEGA2K12FOR1 | 799  | AG-ATGGATAGGAGACCCATTTCT-AGCTAAAAGTAGAGGAAGGATA    | 843  |
|              |      | .                                                  |      |
| 92871        | 1193 | AGAAGGGATAGGAGACCCAATTCTAAGCTAAGAGTAGAGGAGGGATA    | 1239 |

Query: OEGA2N17FOR1  
Subject: 161027

|              |     |                                                       |     |
|--------------|-----|-------------------------------------------------------|-----|
| OEGA2N17FOR1 | 1   | CCTAGTGTGACAGTGATTTATTGATATTCGCAGCTTCCTTTAGACGCTC     | 50  |
|              |     |                                                       |     |
| 161027       | 20  | CCTAGTGTGACAGTGATTTATTGATATTCGCAGCNTCCTTTAGACGCTC     | 69  |
| OEGA2N17FOR1 | 51  | ACCCTCAGCACCAGAAGTCTTTTGCCTGTTAAGGGTAATAGCAATGTGTA    | 100 |
|              |     |                                                       |     |
| 161027       | 70  | ACCCTCAGCACCAGAAGTCTTTTGCCTGTTAAGGGTAATAGCAATGTGTA    | 119 |
| OEGA2N17FOR1 | 101 | AATAATGTGATAGCACGAGATATCCCATCTATTTTCCAGAAATTTGACTAGAA | 150 |
|              |     |                                                       |     |
| 161027       | 120 | AATAATGTGATAGCACGAGATATCCCATCTATTTTCCAGAAATTTGACTAGAA | 169 |
| OEGA2N17FOR1 | 151 | TATGATGTAAACCTTTTCGGAACCCGCAAGGTCAACAAGGTTTCAGTCGAGC  | 200 |
|              |     |                                                       |     |
| 161027       | 170 | TATGATGTAAACCTTTTCGGAACCCGCAAGGTCAACAAGGTTTCAGTCGAGC  | 219 |
| OEGA2N17FOR1 | 201 | AAAACGGAAGTTAGTGGTTGAATCCTTTTCCCATCTACTCTCAATCACAC    | 250 |
|              |     |                                                       |     |
| 161027       | 220 | AAAACGGAAGTTAGTGGTTGAATCCTTTTCCCATCTACTCTCAATCACAC    | 269 |
| OEGA2N17FOR1 | 251 | ATGTGAAAACACTATGAGAGCGGCTACTTTCTCTGTTTCATATTTGTCGCA   | 300 |
|              |     |                                                       |     |
| 161027       | 270 | ATGTGAAAACACTATGAGAGCGGCTACTTTNTCTGTTTCATATTTGTCGCA   | 319 |
| OEGA2N17FOR1 | 301 | GCAACTTTCCTATTTGCTGAACCCTGAAGCAAACTCAAATTTAATGCA      | 350 |
|              |     |                                                       |     |
| 161027       | 320 | GCAACTTTCCTATTTGCTGAACCCTGAAGCAAACTCAAATTTAATGCA      | 369 |
| OEGA2N17FOR1 | 351 | TAGAGACATACATTGTGCATGCACACATGCATCTTTGAAGATTGTAATCA    | 400 |
|              |     |                                                       |     |
| 161027       | 370 | TAGAGACATACATTGTGCATGCACACATGCATCTTTGAAGATTGTAATCA    | 419 |
| OEGA2N17FOR1 | 401 | GAGTAAACTAAAAGACAGTGAAAATAGTCACCTGACTCAGAAGCTGAAGA    | 450 |
|              |     |                                                       |     |
| 161027       | 420 | GAGTAAACTAAAAGACAGTGAAAATAGTCACCTGACTCAGAAGCTGAAGA    | 469 |
| OEGA2N17FOR1 | 451 | ATGTCGCCTACAGTTTGCACCTCAAATTCGGATAGATTTTCAACATACAC    | 500 |
|              |     |                                                       |     |
| 161027       | 470 | ATGTCGCCTACAGTTTGCACCTCAAATTCGGATAGATTTTCAACATACAC    | 519 |
| OEGA2N17FOR1 | 501 | GCCTTTTTTGTATGTCCTCACGTAGCTAAAAATAGAGATGATGAATATGAG   | 550 |
|              |     |                                                       |     |
| 161027       | 520 | GCCTTTTTTGTATGTCCTCACGTAGCTAAAAATAGAGATGATGAATATGAG   | 569 |
| OEGA2N17FOR1 | 551 | GAAACAATAATATAATCTTTTAACAATTGAAGCGCCAAAATATCCTATCA    | 600 |
|              |     |                                                       |     |
| 161027       | 570 | GAAACAATAATATAATCTTTTAACAATTGAAGCGCCAAAATATCCTATCA    | 619 |
| OEGA2N17FOR1 | 601 | AAAAGGTAAAAGTACCATCAGATTTGTGGATGAAGGATCAAGAAGATCAG    | 650 |
|              |     |                                                       |     |
| 161027       | 620 | AAAAGGTAAAANTACCATCAGATTTGTGGATGAANGATCAAGAAGATCAG    | 669 |

|              |     |                                                      |     |
|--------------|-----|------------------------------------------------------|-----|
| OEGA2N17FOR1 | 651 | ATATTTGTTTCATTATAAAATCTCCAGGAAAGAGCATTGCAATTGTATATT  | 700 |
| 161027       | 670 | .                                                    | 719 |
| OEGA2N17FOR1 | 701 | AGTCGTTTCATCTCTTCTGATTTCCCTCCTCCTGAAAAGTAAAACACGCG-A | 749 |
| 161027       | 720 |                                                      | 769 |
| OEGA2N17FOR1 | 750 | AGAAGTGTCTTATTGCAATGAAAATGCTTATATTAGAA-GTGACTTAGCA   | 798 |
| 161027       | 770 |                                                      | 819 |
| OEGA2N17FOR1 | 799 | AATGGAGTCAAAGAGGGTT                                  | 817 |
| 161027       | 820 |                                                      | 838 |

Query: OEGA3A22REV1  
Subject: 124756

|              |     |                                                     |     |
|--------------|-----|-----------------------------------------------------|-----|
| OEGA3A22REV1 | 2   | AAA--TCAA-----GAGATT---CGTC----TACATATATGACT        | 31  |
| 124756       | 145 | .     .                                             | 194 |
| OEGA3A22REV1 | 32  | TTGCCAAGGTCACCTTATATAGGACTCCAAATTATGGTGTCTTTTTTGGT  | 81  |
| 124756       | 195 | .       .                                           | 244 |
| OEGA3A22REV1 | 82  | TTCCAATGCACCAAAT-AAAAATAAGCAATCTATTAGTGTCTTTGCAAT   | 130 |
| 124756       | 245 |                                                     | 294 |
| OEGA3A22REV1 | 131 | GTTGATCAAATTAATAAATAAATGAGTAATGTTATTTAACAACACTAGTA  | 180 |
| 124756       | 295 | .                                                   | 344 |
| OEGA3A22REV1 | 181 | TTTAACATCAATTTAGATAATAGCACTAATGGTATTAGATTATAGGTTCA  | 230 |
| 124756       | 345 | .       .   .                                       | 394 |
| OEGA3A22REV1 | 231 | ATTAAATACAATTAATTATTGTCCATTTATAAGATATATGATATGCTGGT  | 280 |
| 124756       | 395 |                                                     | 444 |
| OEGA3A22REV1 | 281 | ACCTAGATTAATGTTCAATGTCAGTGAAGTGAGAACATTATTCTTATTTA  | 330 |
| 124756       | 445 |                                                     | 494 |
| OEGA3A22REV1 | 331 | CTAGTGTGTTTGAATGTTGACCAATCACTATTGGACTATTGTCCAAAAT   | 380 |
| 124756       | 495 |                                                     | 544 |
| OEGA3A22REV1 | 381 | TGTAGACATTGTGACCTAACTCTTAAAATCAACCTACAATAGAAGAAGAC  | 430 |
| 124756       | 545 |                                                     | 594 |
| OEGA3A22REV1 | 431 | ATATCTGAAGACGTCAATGGTCCCACCGTCCAAGCTAAGTTCATCTCAGC  | 480 |
| 124756       | 595 |                                                     | 644 |
| OEGA3A22REV1 | 481 | AAGATTCAAGACCTTTATCTGAAATTTAGCCCTTGTTTCGAGTCCTATTTT | 530 |
| 124756       | 645 |                                                     | 694 |

|              |     |                                                      |     |
|--------------|-----|------------------------------------------------------|-----|
| OEGA3A22REV1 | 531 | TTATTTAAAATATATTCTTCAACAGTTATTTGATCTAATTTCAATCACATA  | 580 |
|              |     |                                                      |     |
| 124756       | 695 | TTATTTAAAATATATTCTTCAACAGTTATTTGATCTAATTTCAATCACATA  | 744 |
| OEGA3A22REV1 | 581 | TTTTTTAATAAAAATAATATTATACATAAAATTTAAAATTTTTTCCGTATTT | 630 |
|              |     |                                                      |     |
| 124756       | 745 | TTTTTTAATAAAAATAATATTATACATAAAATTTAAAATTTTTTCCGTATTT | 794 |
| OEGA3A22REV1 | 631 | TTTAATCACACGTTCTCCATTATAGTACCATTGCAAAATGCATGTTTTTA   | 680 |
|              |     |                                                      |     |
| 124756       | 795 | TTTAATCACACGTTCTCCATTATAGTACCATTGCAAAATGCATG-TTTTN   | 843 |
| OEGA3A22REV1 | 681 | AAAGGGGAAGGGGGGGG                                    | 697 |
|              |     | .                                                    |     |
| 124756       | 844 | NAAGGGGAAGGGGGGGG                                    | 860 |

Query: OEGA3F20FOR1  
Subject: 127667

|              |      |                                                     |      |
|--------------|------|-----------------------------------------------------|------|
| OEGA3F20FOR1 | 1    | ACCTAAAGTTTCCTCGTGAAATAACATTTTTGGCCTAATTAATCATTGGT  | 50   |
|              |      |                                                     |      |
| 127667       | 818  | ACCTAAAGTTTCCTCGTGAAATAACATTTTTGGCCTAATTAATCATTGGT  | 867  |
| OEGA3F20FOR1 | 51   | TAAACATTACATGAAATATCACCAATAAAGTTAATATTATTCATCTCCCA  | 100  |
|              |      |                                                     |      |
| 127667       | 868  | TAAACATTACATGAAATATCACCAATAAAGTTAATATTATTCATCTNCCA  | 917  |
| OEGA3F20FOR1 | 101  | AGTGGATTTGAAAATTAATTTAAGCTCCAGCTATTTATTAACATCATATT  | 150  |
|              |      |                                                     |      |
| 127667       | 918  | AGTGGATTTGAAAATTAATTTAAGCTCCAGCTATTTATTAACATCACATT  | 967  |
| OEGA3F20FOR1 | 151  | CAGATTCCTTTCTCAAACAACGAATTGAGGTACCTCTTGCATTATTAGTT  | 200  |
|              |      |                                                     |      |
| 127667       | 968  | CAGATTCCTTTCTCAAACAACGAATTGAGGTACCTCTTGCATTATTAGTT  | 1017 |
| OEGA3F20FOR1 | 201  | GAGCCTGAATTGGAACATTTTGAATTCGCTACTTTATAAAACATTTAAT   | 250  |
|              |      |                                                     |      |
| 127667       | 1018 | GAGCCTGAATTGGAACATTTTGAATTCGCTACTNTATAAAACATTTAAT   | 1067 |
| OEGA3F20FOR1 | 251  | CCTTAACGTTGTCCCTCAGGAGTCTTCTGATTAATTCTTTCACATGCTAC  | 300  |
|              |      |                                                     |      |
| 127667       | 1068 | CCTTAACGTTGTCCCTCAGGAGTCTTCTGATTAATTCTTTCACATGCTAC  | 1117 |
| OEGA3F20FOR1 | 301  | CAATTTCTCATTTATGTTTCAGTGAAGGCAGATGAATTTTCATCAACGATT | 350  |
|              |      |                                                     |      |
| 127667       | 1118 | CAATTTCTCATTTATGTTTCAGTGAAGGCAGATGAATTTTCATCAACGATT | 1167 |
| OEGA3F20FOR1 | 351  | AGTTTCGAATAAGAAATAAAAAGTTCATCTATTTCATGTGGATGTTGCTTG | 400  |
|              |      |                                                     |      |
| 127667       | 1168 | AGTTTCGAATAAGAAATAAAAAGTTCATCTATTTCATGTGGATGTTGCTTG | 1217 |
| OEGA3F20FOR1 | 401  | TTATGGCGTCTTTAACCTTCTTCTCCTCTTTCCTTTCTGGTGAAAATGA   | 450  |
|              |      |                                                     |      |
| 127667       | 1218 | TTATGGCGTCTTTAACCTTCTTCTCCTCTTTCCTTTCTGGTGAAAATGA   | 1267 |
| OEGA3F20FOR1 | 451  | TAATCTTTTACAAATGTGGAACATTTTCAGGAAAATATGGATCTTCTAGA  | 500  |
|              |      |                                                     |      |
| 127667       | 1268 | TAATCTTTTACAAATGTGGAACATTTTCAGGAAAATATGGATCTTCTAGA  | 1317 |
| OEGA3F20FOR1 | 501  | AGATGGATATAGAGGTGATGTTATTGGAGAAGCGACGCCTGATGTTCTTG  | 550  |
|              |      |                                                     |      |
| 127667       | 1318 | AGATGGATATAGAGGTGATGTTATTGGAGAAGCGACGCCTGATGTTCTTG  | 1367 |

|              |      |                                                     |      |
|--------------|------|-----------------------------------------------------|------|
| OEGA3F20FOR1 | 551  | TCAGTGAATTTGTATGGTCCTACTCCTACTTAATATCTCTTGTGTGCACA  | 600  |
|              |      |                                                     |      |
| 127667       | 1368 | TCAGTGAATTTGTATGGTCCTACTCCTACTTAATATCTCTTGTGTGCACA  | 1417 |
| OEGA3F20FOR1 | 601  | AATGTCCTTACCTCTCAGATTTTCCTTTGCTTTTCAGATAATATTTGCAC  | 650  |
|              |      |                                                     |      |
| 127667       | 1418 | AATGTCCTTACCTCTCAGATTTTCCTTTGCTTTTCAGATAATATTTGCAC  | 1467 |
| OEGA3F20FOR1 | 651  | AAAAGTTTAATTAATGTTCAAGTCAACATATTGATGCCCTTTGATTTCC   | 700  |
|              |      |                                                     |      |
| 127667       | 1468 | AAAAGTTTAATTAATGTTCAAGTCAACATATTGATGCCCTTTGATTTCC   | 1517 |
| OEGA3F20FOR1 | 701  | TGTTAATAAAAATATTCTTCTGTGTGCTAAAATTACATTAATCAAGTATGG | 750  |
|              |      |                                                     |      |
| 127667       | 1518 | TGTTAATAAAAATATTCTTCTGTGTGCTAAAATTACATTAATCAAGTATGG | 1567 |
| OEGA3F20FOR1 | 751  | ACCTACACCAAGAAATCCAGGTCGACAGCATGA--TATTTTTTGCATCTT  | 798  |
|              |      | .                                                   |      |
| 127667       | 1568 | ACCTACACCAAGAAATCCAGGTCGACAGCATGAATAATTTTTTGCATC-T  | 1616 |
| OEGA3F20FOR1 | 799  | CATTCAATCCCTTCAGTA                                  | 816  |
|              |      |                                                     |      |
| 127667       | 1617 | CATTCAATCCCTTCAGTA                                  | 1634 |

Query: OEGA3K14FOR1  
Subject: 104867

|              |     |                                                      |     |
|--------------|-----|------------------------------------------------------|-----|
| OEGA3K14FOR1 | 1   | TCATGTGCCATAACATCGAGCCTATATCCACAGAACAACATTTACAAAT    | 50  |
|              |     |                                                      |     |
| 104867       | 331 | TCATGTGCCATAACATCGAGCCTATATCCACAGAACAACATTTACAAAT    | 380 |
| OEGA3K14FOR1 | 51  | CCAAGGGCCGGATTTCATATAACCATTTGGTTAGAGGGAACAAGATTGATCT | 100 |
|              |     |                                                      |     |
| 104867       | 381 | CCAAGGGCCGGATTTCATATAACCATTTGGTTAGAGGGAACAAGATTGATCT | 430 |
| OEGA3K14FOR1 | 101 | AGCCACGTACATCTACAATCAAATCCTTGGTACAGGCACTTGGGGTGATA   | 150 |
|              |     | .                                                    |     |
| 104867       | 431 | AGCCACGTACATCTACAATCAAATCCTTGGNACAGGCACTTGGGGTGATA   | 480 |
| OEGA3K14FOR1 | 151 | GGCACTACTCCCTAATTTTTCCAGTCTGATATGTGGAATATGTAGAGCA    | 200 |
|              |     | .                                                    |     |
| 104867       | 481 | GGCACTACTCCCTAATTTTTCCAGTCTGATANGTGAATATGTAGAGCA     | 530 |
| OEGA3K14FOR1 | 201 | ACAGGAATACAAATCCAACCTGGGGAAGCACCNGAAAAGCCAAGTCCCTT   | 250 |
|              |     | . . .      .      .                                  |     |
| 104867       | 531 | GCNNGGATACAAATCCAACCTGGGGAAGCACCNGAAAAGCCAAGNCCCTT   | 580 |
| OEGA3K14FOR1 | 251 | TATCAAGCAATCCACACTAGAGGCCCAAGACCGAGCAAGACTGAAGCACC   | 300 |
|              |     |                                                      |     |
| 104867       | 581 | TATCAAGCAATCCACACTAGAGGCCCAAGACCGAGCAAGACTGAAGCACC   | 630 |
| OEGA3K14FOR1 | 301 | AACAGAAATTAGAGAACGCACGGCGACTACGGCAATTGAACGAGGAAGGT   | 350 |
|              |     | .      .      .                                      |     |
| 104867       | 631 | AACAGAAATTAGAAAACGCACGACGACGACGGCAATTGAATGAGGAAGGT   | 680 |
| OEGA3K14FOR1 | 351 | CAAGCAGATGCAGACCTTGACATGCCTCAAATTCCTCCACCACCACCCCA   | 400 |
|              |     |                                                      |     |
| 104867       | 681 | CAAGCAGATGCAGACCTTGACATGCCTCAAATTCCTCCACCACCACCCCA   | 730 |
| OEGA3K14FOR1 | 401 | AGCTGATATGGACAATCAGTTTTGAGGCAGATTTTACCCTCCACCACAG    | 450 |
|              |     | .                                                    |     |
| 104867       | 731 | AGCTGATATGGACAATCAGTTTTGAGGCAGATTTTACCACCACCACAG     | 780 |

|              |      |                                                     |      |
|--------------|------|-----------------------------------------------------|------|
| OEGA3K14FOR1 | 451  | GGATCAGCCGCGATGTGCAGAGTCTCCAGCAGGCTATGGGAATTTTGACG  | 500  |
|              |      |                                                     |      |
| 104867       | 781  | GGATCAGCCGCGATGTGCAGAGTCTCCAGCAGGCTATGGGAATTTTGACG  | 830  |
| OEGA3K14FOR1 | 501  | ACTGAGGTACATACAACCCACCGTGACGTCCGCATTGCCCTCTGATATGTC | 550  |
|              |      | .     .     .     .     .     .     .               |      |
| 104867       | 831  | ACTGAGGTGCATACAGCCCACCGTGACGTCCGCATTGCCACTGATATGTC  | 880  |
| OEGA3K14FOR1 | 551  | ACGTGCCGCCGCCAGGATGCCAGGCAGCTAGGAGGGAGATGGACACTA    | 600  |
|              |      | .                                                   |      |
| 104867       | 881  | ACGTGCCGCTCGCCAGGATGCCAGGCAGCTAGGAGGGAGATGGACACTA   | 930  |
| OEGA3K14FOR1 | 601  | TGAATGGTCGACTAAGTGTGTACGTGGGCA-GGTGGATGGCATCCAGCTG  | 649  |
|              |      |                                                     |      |
| 104867       | 931  | TGAATGGTCGACTAAGTGTGTACGTGGGCAAGGTGGATGGCATCCAGCTG  | 980  |
| OEGA3K14FOR1 | 650  | AGAGTTAATGAAACTTGGGAGCGTTA-GCCGTTTGAAGACACGTGTTGA   | 698  |
|              |      | .  .                                                |      |
| 104867       | 981  | AGGGTAAATGAAACTTGGGAGCGTTTAGGCCGTTTGGAGACACGGGTTGA  | 1030 |
| OEGA3K14FOR1 | 699  | GGGGATCCACGAGGAAATGACACAGCAGTCAGCACTGATGAGAGAAATCA  | 748  |
|              |      |                                                     |      |
| 104867       | 1031 | GGGGATCCACGATGAAATGACACAGCAGTCAGCACTGATGAGAGAAATCA  | 1080 |
| OEGA3K14FOR1 | 749  | TATCTCGCCTTC                                        | 760  |
|              |      |                                                     |      |
| 104867       | 1081 | TATCTCGCCTTC                                        | 1092 |

Query: OEGA3N17REV1  
Subject: 105766

|              |     |                                                     |     |
|--------------|-----|-----------------------------------------------------|-----|
| OEGA3N17REV1 | 1   | AGAGGCGCTGCTGCACTTCTGCAAGAGGCGTTGCACGGTGGCGGTCGAAG  | 50  |
|              |     |                                                     |     |
| 105766       | 182 | AGAGGCGCTGCTGCACTTCTACAAGAGGCGTTGCACGATGGCGCTCTAAG  | 231 |
| OEGA3N17REV1 | 51  | TGGATCTCTCAGCGTCGACGCCGCTGCGAACAGTTTCTCTGTGTAGGTGG  | 100 |
|              |     | .  .     .     .     .     .                        |     |
| 105766       | 232 | TGGATCTCTCAGCGTCAATGCCGCTGTGAACAGTTTCTCTGTACAGGTGG  | 281 |
| OEGA3N17REV1 | 101 | ACGTGGGTGGTTTTGGTGAC-----GGTGGTGCGGCGGATCT          | 137 |
|              |     |                                                     |     |
| 105766       | 282 | ACGTGGGTGGTTTTGGTGACGGTGTGGAGTGATGGTGGTGCGGTGGATCT  | 331 |
| OEGA3N17REV1 | 138 | AGGTAGGACGACAGTGGTGGTAATGGTAGCGACGGTCTCCTGTTAGCAGT  | 187 |
|              |     | .   .     .     .     .                             |     |
| 105766       | 332 | AGGTAGGATGACGGTGGTGGTGGTAGCGGCGGTCTCCTGTTAGCAGT     | 381 |
| OEGA3N17REV1 | 188 | GGGGATTTGGGTGGTGTGGTGGAGGTTGGGAACGGTGTATTGTTAGGTGT  | 237 |
|              |     | .                                                   |     |
| 105766       | 382 | AGGGATTTGGGTGGTGTGGTGGAGGTTGGGAACGGTGTATTGTTAGGTGT  | 431 |
| OEGA3N17REV1 | 238 | GTTTGGTGGTGGTTCTTGTATGGTTCTCGCCCTGGTGGCTGTGGTGGTT   | 287 |
|              |     | .     .   .                                         |     |
| 105766       | 432 | GTTTGGTGGTGGTTCTTGTGTGGTTGTCTCCTGGTGGCTGTGGTGGTT    | 481 |
| OEGA3N17REV1 | 288 | TTTGGCGATGGTTCGTGTTGGCGGTGGAGAAGGTAGTGAGTTTGTGGGTTG | 337 |
|              |     |                                                     |     |
| 105766       | 482 | TTTGGCGATGGTTCGTGTTGGCGGTGGAGAAGGTAGTGAGTTTGTGGGTTG | 531 |
| OEGA3N17REV1 | 338 | GGTATTTTTGGTGTGTTTGGTGGTGGCGGTTGTGGTGGTTTTTGGCAGCG  | 387 |
|              |     |                                                     |     |
| 105766       | 532 | GGTATTTTTGGTGTGTTTGGTGGTGGCGGTTGTGGTGGTTTTTGGCAGCG  | 581 |

|              |     |                                                    |     |
|--------------|-----|----------------------------------------------------|-----|
| OEGA3N17REV1 | 388 | ACGAAGGTGATTGTTCTTGGCAACCATTTTGGTGGCTGTGATGTCGTGGA | 437 |
|              |     |                                                    |     |
| 105766       | 582 | ACGAAGGTGATTGTTCTTGGCNCNCATTTTGGTGGCTGTGATGTCGTGGA | 631 |
| OEGA3N17REV1 | 438 | GTTGGTGTAGTGGTGGTGT                                | 458 |
|              |     |                                                    |     |
| 105766       | 632 | GTTGGTGTGGTGGCGGTGT                                | 652 |

Query: OEGA5M07FOR1  
Subject: 1206

|              |     |                                                     |     |
|--------------|-----|-----------------------------------------------------|-----|
| OEGA5M07FOR1 | 1   | AACGTGTTTTACTGAAATTCATTAAATTCATTCAAAAAATAATTATCTCC  | 50  |
|              |     |                                                     |     |
| 1206         | 246 | AACGTGTTTTCTGAAATTCATTAAATTCATTAGAAAAATAATTATCTCC   | 295 |
| OEGA5M07FOR1 | 51  | CAAAGCAATTCATAATTGAGTTTTCAGGCGAGATTTTTTAATAATTTAGT  | 100 |
|              |     |                                                     |     |
| 1206         | 296 | CAAAGCAATTCATAATTGAGTTTTCAGGCGAGATTTTTTAATAATTTAGT  | 345 |
| OEGA5M07FOR1 | 101 | TCTTAATTGTGTATTTACAAGAATAATACTGTTTTTCCATTACATTTT    | 150 |
|              |     |                                                     |     |
| 1206         | 346 | TCTTAATTGTGTATTTAGAAAAATAATACTGTTTTTCTATTAGATTTT    | 395 |
| OEGA5M07FOR1 | 151 | TTCCATGTAGTTTTTCCATTTAGCTTTTTTATGTTTTGAAGGTTACGAA   | 200 |
|              |     |                                                     |     |
| 1206         | 396 | TTCCATGTAGCTTTTTCCATTTAGCTTTTTTATATTCTGAAGGTTACGAA  | 445 |
| OEGA5M07FOR1 | 201 | TTCCATAACAATGTGAGTTATAATTTTGTGATTCA-TTTTTTCCCTCTAT  | 249 |
|              |     | .                                                   |     |
| 1206         | 446 | TACCATAACAANGTGAGTTATAATTTTGNATTCATTTTTTTCCCTNCTAT  | 495 |
| OEGA5M07FOR1 | 250 | TAGTGTAGCGCATCCATAGGTGAACCCACATGGGTTTCATGTTGGCGGGGT | 299 |
|              |     |                                                     |     |
| 1206         | 496 | TAGTGTAGNGNATCCATAGGNGAACCCACATGGGTTTCATGTNGGNGGGGT | 545 |
| OEGA5M07FOR1 | 300 | CAAGTGACCCACATATTTTTTTTTGAAAAATCCAT-ATTGTTTGATGTC   | 348 |
|              |     |                                                     |     |
| 1206         | 546 | CAAGTGACCCACATNTTTTTTTTG-AAAATCTATAATTGTTTGATGTC    | 594 |
| OEGA5M07FOR1 | 349 | AAAAAAAATTGAAA-ATTGTTATTTTTAATCCCATTTCAA---GCCTCAT  | 394 |
|              |     | .                                                   |     |
| 1206         | 595 | AAATAAAATTGAAATATT-NTATTCTTAATCCCATTTCAAAGTG-CTCAT  | 642 |
| OEGA5M07FOR1 | 395 | AACCTA-TTTTTGCTATTTAATGGCCCTTAAAAT-GTTAACTATTGAAAA  | 442 |
|              |     | .                                                   |     |
| 1206         | 643 | GACCTATTTTTTGCTTTTTAATGGCACATGAAGTGGTTAACTATTGTAAA  | 692 |

Query: OEGA6E01FOR1  
Subject: 100173

|              |     |                                                    |     |
|--------------|-----|----------------------------------------------------|-----|
| OEGA6E01FOR1 | 1   | GTACCGTCATTTGGCATTATTTAATTTCTCACTGAAATAAGTAATAGGGT | 50  |
|              |     | .   .                                              |     |
| 100173       | 629 | GTACCTTAACTTGGCATCATTTAGTTTCTCATTGAAATAAGCAATAGGGT | 678 |
| OEGA6E01FOR1 | 51  | GGCGCTCTTAGCTCAAACCTCCACCTATCCCTACCGCAGAGGCATCGCAT | 100 |
|              |     | .  .                                               |     |
| 100173       | 679 | GGCTTTCATAGCTC-AAACTCCACCTACTCCTACCTCGGAGGCATCACAT | 727 |
| OEGA6E01FOR1 | 101 | TCTACCTC-AAAAACTTTGAAAAATCGGGAAGTCGCATGACTGGAGCTT  | 149 |
|              |     | .                                                  |     |
| 100173       | 728 | TCGACCTCAAAAAACTTTGGAGAAATCAGGAAGTCGCATGATTGGAGCTT | 777 |



|              |     |                                                     |     |
|--------------|-----|-----------------------------------------------------|-----|
| OEGA7A16FOR1 | 350 | TGGGAGAATGGAGGGAGTGAATTTGGGCTGTGATGAGGAAATCCGAAGCT  | 399 |
|              |     |                                                     |     |
| 158805       | 727 | TGGGAGAATGGAGGGAGTGAATTTGGGCTGTGATGAGGAAATCCGAAGCT  | 775 |
| OEGA7A16FOR1 | 400 | GTAACAGTCTTGATTCTCAAGCAAATCAGCCCATCTTTTGCAAAGAGGAC  | 449 |
|              |     | .                                                   |     |
| 158805       | 776 | GTAACAGTCTNGATTCTCAAGCAAATCAG-CCATCTTTTGCAAAGAGGAC  | 824 |
| OEGA7A16FOR1 | 450 | TCTACTTTGGCTTATGGGGACACAAAAT-AGTTGGTTCATTCATCTTTTT  | 498 |
|              |     | .                                                   |     |
| 158805       | 825 | TCTACTTTGGCTTATGGGGACACAAAATAAGTTGGTTCATTCATCTTTTT  | 874 |
| OEGA7A16FOR1 | 499 | CATACAATGTTTAGTTTTATCTTATCAATGGGACTTCA-AAATAGGGGAA  | 547 |
|              |     |                                                     |     |
| 158805       | 875 | CATACAATGTTTAGTTTTATCTTATCAATGGGACTTCAAGAAATAGGGGAA | 924 |
| OEGA7A16FOR1 | 548 | ACTAGAAACTAGAAAAG-ATAGATTATC-GTACCAAATAATAT         | 588 |
|              |     | .                                                   |     |
| 158805       | 925 | ACTAGAAACTAGAAAAGAATAGA-TATCAGTACAAAATAATAT         | 966 |

Query: OEGA7C17REV1  
Subject: 104811

|              |     |                                                     |     |
|--------------|-----|-----------------------------------------------------|-----|
| OEGA7C17REV1 | 1   | GTAGTTAAAAAGAGTGTAGGTTTTTCATTGGGGTGATGAACAGGAACTTGC | 50  |
|              |     | .                                                   |     |
| 104811       | 199 | GTAGTTAAAAAGAGTGTAGGTTTTTCATTGGGGTGATGAACANGAACTTGC | 248 |
| OEGA7C17REV1 | 51  | ATTTAATACTGTTAAAGGTAGATTGTGTGAAGCACCTGTTTTGGCATTAC  | 100 |
|              |     | .                                                   |     |
| 104811       | 249 | ATTTAATACTATTTAAAGGTAGATTGTGTGAAGCACCTGTTTTGGCATTAC | 298 |
| OEGA7C17REV1 | 101 | CTAACTTTGATAAAACAGTTGAGATTGAGTGTGATGCATCAGGAATAGGG  | 150 |
|              |     | .     .                                             |     |
| 104811       | 299 | CTAACTTTGANAAAACATTCGAGATTGAGTGTGATGCATCAGGAATAGGG  | 348 |
| OEGA7C17REV1 | 151 | ATTGGAGCAGTTTTAATGTAGGATCAGAGGCCTATTGCATACTTTAGCGA  | 200 |
|              |     | .     .                                             |     |
| 104811       | 349 | ATTGGAGCAGTTTTAATGCAGGATCGGAGGCCTATTGCATACTTTAGCGA  | 398 |
| OEGA7C17REV1 | 201 | GAAATTGACTGGAGCTGCTTTAAATTATCCTACATATGACAAAGAACTTT  | 250 |
|              |     | .                                                   |     |
| 104811       | 399 | GAAATTGAGTGGAGCTGCTTTAAATTATCCTACATATGACAAAGAACTTT  | 448 |
| OEGA7C17REV1 | 251 | ATGCACTTGTTCGAGCTTTGGAGACTTGGCAACATTATCTATGGCCGAAG  | 300 |
|              |     |                                                     |     |
| 104811       | 449 | ATGCACTTGTTCGAGCTTTGGAGACTTGGCAACATTATCTATGGCCGAAG  | 498 |
| OEGA7C17REV1 | 301 | GAGTTTGTAAATACATACCGATCATGAGTCACTAAAGCACTTGTGGGGACA | 350 |
|              |     | .     .                                             |     |
| 104811       | 499 | GAGTTCGTAATACACACCGATCATGAGTCACTAAAGCACTTGCAGGGACA  | 548 |
| OEGA7C17REV1 | 351 | AGGTAAATTGAACAAGAGGCATGCACAGTGGATGAAATTCATTGAGACCT  | 400 |
|              |     | .     .                                             |     |
| 104811       | 549 | AGGTAAATTGAACAAGAGGCATGCACAGTGGATGGAATTCATTGAGACCT  | 598 |
| OEGA7C17REV1 | 401 | TTCCATACGTCATTCCGGTATAACAAGTAAAGGAAAATGTGGTGGCGGAT  | 450 |
|              |     | .     .     .                                       |     |
| 104811       | 599 | TTCCATACGTCATTCCGGTATAANCNAGGTAAGGAAAATGTGNTNGCGGAT | 648 |
| OEGA7C17REV1 | 451 | GCGTTGTCGTGAAAGTACGTATTGCTCACTACTCTTGATTCTAAGTTACT  | 500 |
|              |     | .     .     .                                       |     |
| 104811       | 649 | GCGTTGTCGCGAAGGTACNNATTGCTAACTACTCTTNATTCTAAGTTACT  | 698 |



|              |     |                                                    |     |
|--------------|-----|----------------------------------------------------|-----|
| OEGA7C17REV1 | 501 | TGGATTTGAACATATT-AGGAATTGTATG-AAAAGATGTTGAATTTTTGA | 548 |
|              |     | .                                         .        |     |
| 104811       | 699 | TGGNTTTGAACATATTAAGGAATTGTATGAAAAAGATGTTGAATTTTNGG | 748 |
| OEGA7C17REV1 | 549 | ATATTTATTTGTCATGCAT-AAAGGGGCGGTTGATA-GTTCTTTA-GCAT | 595 |
|              |     | .                                                  |     |
| 104811       | 749 | ATATTTATTTGTCATGCATAAAAGGGGTGGTTGATAGGTTCTTTAGGCAT | 798 |
| OEGA7C17REV1 | 596 | GAGGGTTATTTATTT--GGAAAATAGGTTATGGTGTTCCTAATTGT     | 639 |
|              |     | .                           .                      |     |
| 104811       | 799 | GAGGGGTATTTATTTTCGGGAAAATAGGTTAT-GTGTTCNTAATTGT    | 843 |

Query: OEGA8A14REV1  
Subject: 37000

|              |      |                                                     |      |
|--------------|------|-----------------------------------------------------|------|
| OEGA8A14REV1 | 1    | ATCTAATTTTTCTGTATTTTGTGG-AAAGATTTGGCCTTGTAATGGAAGA  | 49   |
|              |      |                                                     |      |
| 37000        | 848  | ATCTAATTTTTCTGTATTTTGTGGAAAAGATTTGGCCTTGTAATGGAAGA  | 897  |
| OEGA8A14REV1 | 50   | GATATTGTGGAATCTTTGAAGCTATATGGGTTGTCTTTATTTGCTATTTT  | 99   |
|              |      |                                                     |      |
| 37000        | 898  | GATATTGTGGAATCTTTGAAGCTATATGGGTTGTCTTTATTTGCTATTTT  | 947  |
| OEGA8A14REV1 | 100  | AGCTGATGTTTAGAACTGGGTTTGGAGCTATTTTGTATACTTTGACGTTT  | 149  |
|              |      |                                                     |      |
| 37000        | 948  | AGCTGATGTTTAGAACTGGGTTTGGAGCTATTTTGTATACTTTGACGTTT  | 997  |
| OEGA8A14REV1 | 150  | TTTGACTAGAACTTAGCTCTTGGAGTGGAAGAGATATTTTGTTTTCTTTT  | 199  |
|              |      |                                                     |      |
| 37000        | 998  | TTTGACTAGAACTTAGCTCTTGGAGTGGAAGAGATATTTTGTTTTCTTTT  | 1047 |
| OEGA8A14REV1 | 200  | GCTCTATTTGGGTTTTCTACAGAATGGCTGAAAAGTACTTTTCTGTTTTT  | 249  |
|              |      |                                                     |      |
| 37000        | 1048 | GCTCTATTTGGGTTTTCTACAGAATGGCTGAAAAGTACTTTTCTGTTTTT  | 1097 |
| OEGA8A14REV1 | 250  | TTTTCTACATTTGACTAATTTCTGAAATGATTTGAGTAATTTTAGGTGA   | 299  |
|              |      |                                                     |      |
| 37000        | 1098 | TTTTCTACATTTGACTAATTTCTGAAATGATTTGAGTAATTTTAGGTGA   | 1147 |
| OEGA8A14REV1 | 300  | TTCTTGGGGCTGGAGGAAATAAATACTGGAAGTGAAGGGTTATTTGGTAAA | 349  |
|              |      |                                                     |      |
| 37000        | 1148 | TTCTTGGGGCTGGAGGAAATAAATACTGGAAGTGAAGGGTTATTTGGTAAA | 1197 |
| OEGA8A14REV1 | 350  | GGTTTTTCCAGGTGGAGGGAGGTGGGCTAGGATTTTGGGTTTTGTAAAAC  | 399  |
|              |      |                                                     |      |
| 37000        | 1198 | GGTTTTTCCAGGTGGAGGGAGGTGGGCTAGGATTTTGGGTTTTGTAAAAC  | 1247 |
| OEGA8A14REV1 | 400  | ATGGGATTAGGTGGTGTATGCATTGAAGAAGGAGTCTTGGGATGTGGGGAA | 449  |
|              |      |                                                     |      |
| 37000        | 1248 | ATGGGATTAGGTGGTGTATGCATTGAAGAAGGAGTCTTGGGATGTGGGGAA | 1297 |
| OEGA8A14REV1 | 450  | ATCAAAGGGGAGAAAGAAGAAAGATGGTACTCTGAGGAGGAGACCGGGT   | 499  |
|              |      |                                                     |      |
| 37000        | 1298 | ATCAAAGGGGAGAAAGAAGAAAGATGGTACTCTGAGGAGGAGACCGGGT   | 1347 |
| OEGA8A14REV1 | 500  | GTTGGATTAAATTGAGGTTTATTGGCAGCTGTATGTCATCAAGATCTAAA  | 549  |
|              |      |                                                     |      |
| 37000        | 1348 | GTTGGATTAAATTGAGGTTTATTGGCAGCTGTATGTCATCAAGATCTAAA  | 1397 |
| OEGA8A14REV1 | 550  | GTTGATAGCTCCATTAGTAGCATCAGCACTCACTGTGGTAATG-CTTTAA  | 598  |
|              |      |                                                     |      |
| 37000        | 1398 | GTTGATAGCTCCATTAGTAGCATCAGCACTCACTGTGGTAATGTCTTTAA  | 1447 |

|              |      |                                                    |      |
|--------------|------|----------------------------------------------------|------|
| OEGA8A14REV1 | 599  | CTTGTAGC-TTCAA-TTTTTATTTATTTATTTTTTTATATCTCGACTGGT | 646  |
|              |      |                                                    |      |
| 37000        | 1448 | CTTGTAGCTTCAATTTTTATTTATTTA-TTTTTATATCTCGACTGGT    | 1496 |
| OEGA8A14REV1 | 647  | ATGAAGTTTTGCTTAATAGTA                              | 667  |
|              |      | .                                                  |      |
| 37000        | 1497 | ATGA--GTTTGCTTAATAGTA                              | 1515 |

Query: OEGA8J23REV1  
Subject: 110847

|              |      |                                                     |      |
|--------------|------|-----------------------------------------------------|------|
| OEGA8J23REV1 | 1    | ATTCGAATTGAACCATATATCCTTTTG-AACCTAAACAAATAAGCAAAAT  | 49   |
|              |      |                                                     |      |
| 110847       | 1249 | ATTCGAATTGAACCATATATCCTTTTGAAACCTAAACAAATAAGCAAAAT  | 1298 |
| OEGA8J23REV1 | 50   | GAGCCTGTGGACTACAAACCATTCAAAAACTAGAAGTAACTGGCATT     | 99   |
|              |      |                                                     |      |
| 110847       | 1299 | GAGCCTGTGGACTACAAACCATTCAAAAACTAGAAGTAACTGGCATT     | 1348 |
| OEGA8J23REV1 | 100  | GCTAGATAGTTATAAGTTCATCCTAGTTTAGATCGAATAGACATTAATGT  | 149  |
|              |      |                                                     |      |
| 110847       | 1349 | GCTAGATAGTTATAAGTTCATCCTAGTTTAGATCGAATAGACATTAATGT  | 1398 |
| OEGA8J23REV1 | 150  | AAAGTAGGATAATTAGAACTTTATTAAGAGAATACAAATTGAAAGATT    | 199  |
|              |      |                                                     |      |
| 110847       | 1399 | AAAGTAGGATAATTAGAACTTTATTAAGAGAATACAAATTGANAGATT    | 1448 |
| OEGA8J23REV1 | 200  | AAAGGTACAATAGAAGAAGCTTCAACCCATTCCATGACAAATTCAGTTGA  | 249  |
|              |      |                                                     |      |
| 110847       | 1449 | AAAGGTACAATAGAAGAAGCTTCAACCCATTCCATGACAAATTCAGTTGA  | 1498 |
| OEGA8J23REV1 | 250  | AAAATAGTTTTATCATTGATTCAGTTTTAACGAATTA AAAATCCTTGCCG | 299  |
|              |      |                                                     |      |
| 110847       | 1499 | AAAATAGTTTTATCATTGATTCAGTTTTAACGAATTA AAAATCCTTGCCG | 1548 |
| OEGA8J23REV1 | 300  | GAACGGTTGATGCATATATTGGGTAATTAGCATTTTAACTGAATATAAAG  | 349  |
|              |      |                                                     |      |
| 110847       | 1549 | GAACGGTTGATGCATATATTGGGTAATTAGCATTTTAACTGAATATAAAG  | 1598 |
| OEGA8J23REV1 | 350  | ATTTTCGTTCTTCCCATCATCATTTTTAACATAGATCTCCATTTGATCAC  | 399  |
|              |      |                                                     |      |
| 110847       | 1599 | ATTTTCGTTCTTCCCATCATCATTTTTAACATAGATCTCCATTTGATCAC  | 1648 |
| OEGA8J23REV1 | 400  | TCCTGATACTTCCTCCACCATTGTTAATTTTATTATATTTAATGAATATC  | 449  |
|              |      |                                                     |      |
| 110847       | 1649 | TCCTGATACTTCCTCCACCATTGTTAATTTTATTATATTTAATGAATATC  | 1698 |
| OEGA8J23REV1 | 450  | CTAATATTAAGTCTACTTTGAGAAGTACAAAATCTAATTTTCTGATTC    | 499  |
|              |      |                                                     |      |
| 110847       | 1699 | CTAATATTAAGTCTACTTTGAGAAGTACAAAATCTAATTTTCTGATTC    | 1748 |
| OEGA8J23REV1 | 500  | TACAATAATCTTTTGAAGTGAACAGATTAATAAGGATAAAAATTACAACAT | 549  |
|              |      | .                                                   |      |
| 110847       | 1749 | TATAATAATCTTTTGAAGTGAACAGATTAATAAGGANAAAATTACAACAT  | 1798 |
| OEGA8J23REV1 | 550  | CATCAAGAATATTA AATTTATCTAGCAAGTAGAAATCTTTGGAATGAAAG | 599  |
|              |      |                                                     |      |
| 110847       | 1799 | CATCAAGAATATTA AATTTATCTAGCAAGTAGAAATCTTTGGAATGAAAG | 1848 |
| OEGA8J23REV1 | 600  | AGTTGAATTACAGTACTTCATCAAGAATAAACGAGTGCT-CTCGTAAAAA  | 648  |
|              |      |                                                     |      |
| 110847       | 1849 | AGTTGAATTACAGTACTACATCAAGAATAAACGAGTGGTACTCGTAAAAA  | 1898 |

|              |      |                                                    |      |
|--------------|------|----------------------------------------------------|------|
| OEGA8J23REV1 | 649  | AAAAAAATTGAGAAAGGTTTATGGTCTTAATGGAATATAAAGGGATAGTA | 698  |
| 110847       | 1899 | .                                                  | 1947 |
| OEGA8J23REV1 | 699  | GCAATGATGCTAAC-AGTCTTTCACATAGATGTCCTTGAATTCCGCGATT | 747  |
| 110847       | 1948 |                                                    | 1997 |
| OEGA8J23REV1 | 748  | GTGTGATAAA-GTTTTTCGAGCCAAAATTTTTAAAACAATTTCTACGTCT | 796  |
| 110847       | 1998 | .         .           .                            | 2046 |
| OEGA8J23REV1 | 797  | GTTGTT 802                                         |      |
| 110847       | 2047 |                                                    |      |
|              |      | GTTGTT 2052                                        |      |

Query: OEGA8M11FOR1  
Subject: 132300

|              |     |                                                     |     |
|--------------|-----|-----------------------------------------------------|-----|
| OEGA8M11FOR1 | 1   | ATTTTATGAGATATGGAAGAATTAAGAGATTGTTTAATATTAAGAATC    | 50  |
| 132300       | 191 |                                                     | 240 |
| OEGA8M11FOR1 | 51  | AATACTTGCCTGAAATCCATATAACATAATCAATTAAGTGATAATATACT  | 100 |
| 132300       | 241 | .                                                   | 290 |
| OEGA8M11FOR1 | 101 | TCAATATAAGTAAACAAGAAAACACATGGAATTAGAATTAGAAGTAGCAT  | 150 |
| 132300       | 291 | .                     .                             | 340 |
| OEGA8M11FOR1 | 151 | GAATTAATTATCAACGAAAATCTAGTTATGAATTTTTAGCATATAGGGAA  | 200 |
| 132300       | 341 | .     .     .     .   .                             | 390 |
| OEGA8M11FOR1 | 201 | AGAGAATTGTTTCATATTAGCCAAACAGAAAAGATACAATTGAAATTTAA  | 250 |
| 132300       | 391 |                                                     | 440 |
| OEGA8M11FOR1 | 251 | TAGATCATAGATAAGTCAAGAGTCCCATCAGTGTAGCCTTTTTTGTAAC   | 300 |
| 132300       | 441 |                                                     | 490 |
| OEGA8M11FOR1 | 301 | CGTAAACATTGAGAGTTCATTATTTAGTAGTTCAAACACACGTGTCATCC  | 350 |
| 132300       | 491 | .                                         .         | 540 |
| OEGA8M11FOR1 | 351 | ATTTGTAGTTGTTTCTCTCTAACATAATCTGTCAATCTATGGTGAGACAT  | 400 |
| 132300       | 541 | .   .         .                                     | 590 |
| OEGA8M11FOR1 | 401 | CGTATTACACCATTGGTCTTAAAGTTTGTAGTAACATTCCAATTGCGAT   | 450 |
| 132300       | 591 | .                                                   | 640 |
| OEGA8M11FOR1 | 451 | ATGAAGAGTCGTGAATTTGAACATTGCTTACAAATTTTCAGCAAATGTTGT | 500 |
| 132300       | 641 |                                                     | 690 |
| OEGA8M11FOR1 | 501 | CTAGCATATCTTCCAAGTATATACTGCAAAGTAAAAGATAAATCAATGA   | 550 |
| 132300       | 691 | .                                                   | 740 |
|              |     | CTAGCATATCTTCCAAGTATATACTGCAAAGTAAAANGATAAATCAATGA  |     |

|              |      |                                                     |      |
|--------------|------|-----------------------------------------------------|------|
| OEGA8M11FOR1 | 551  | ATTATCGAATTTGAAATTATGTGGAAAAATGTGAATATGGAATGACATTT  | 600  |
|              |      |                                                     |      |
| 132300       | 741  | ATTATCGAATTTNAAATTATGTGNAAAANNGTGAATATGGAATGACATTT  | 790  |
| OEGA8M11FOR1 | 601  | TATACATTTAAGTAAAGAAAGATAACAAGTGATAAACAATCGAAGTTAAAG | 650  |
|              |      |                                                     |      |
| 132300       | 791  | TATACATTTAAGTAAAGAAAGATAACAAGTGATAAACAATCGAAGTTAAAG | 840  |
| OEGA8M11FOR1 | 651  | AGAACCTTACAATTTTTCGATGACCGTTGTGATTAGCTGTTAATGTTACT  | 700  |
|              |      |                                                     |      |
| 132300       | 841  | AGAACCTTACAATTTTTCGATGANCGTTGTGATTAGCTGNTAATGTTACT  | 890  |
| OEGA8M11FOR1 | 701  | TCAAAGACAAGATTACCTGTAAGTAAAGTGTCTTGTTCA-GAATATCATG  | 749  |
|              |      |                                                     |      |
| 132300       | 891  | TCAAAGACAAGATTACCTNTAAGTAAAGTGTCTTGTTCCAGGAATATCANN | 940  |
| OEGA8M11FOR1 | 750  | GTCGTGTATTACCTCTAGCCCCGAACGGTATAGTATTGTGACGTTGAATG  | 799  |
|              |      | .  .                                                |      |
| 132300       | 941  | GTNGTNTATTACCTCTNGCCCCGAACGGTATAGTATTGTGACGTTGAATG  | 990  |
| OEGA8M11FOR1 | 800  | TAGAATTCTCGTTAATATTCAAACACAAG-AGATAACCATCTTGT-AGGT  | 847  |
|              |      |                                                     |      |
| 132300       | 991  | TAGAATTCTCGTT-ATATTCAAACACAAGAAGATAACCATCTTGTAAAGTT | 1039 |
| OEGA8M11FOR1 | 848  | ATGATGGTAAAAAAA                                     | 862  |
|              |      |                                                     |      |
| 132300       | 1040 | ATGATGGTAAAAAAA                                     | 1054 |

Query: OEGA9002FOR1  
Subject: 142205

|              |      |                                                      |      |
|--------------|------|------------------------------------------------------|------|
| OEGA9002FOR1 | 1    | TTATCTATTGTAAGGAGATAAGAAAAATTATGGGAAGGATGAAAAAAGGC   | 50   |
|              |      |                                                      |      |
| 142205       | 877  | TTATCTATTGTAAGGAGATAAGAAAAATTATGGGAAGGATGAAAAAAGGC   | 926  |
| OEGA9002FOR1 | 51   | AACGTGTCTCCAAACGACAGTGCAGAAGTCAGCTTTCCTAAAAGGCTATA   | 100  |
|              |      |                                                      |      |
| 142205       | 927  | AACGTGTCTCCAAACGACAGTGCAGAAGTCAGCTTTCCTAAAAGGCTATA   | 976  |
| OEGA9002FOR1 | 101  | AGGTAGTCATCATCGATTAGCATTAGAAGAGCAAACATCTCCAAAAGTC    | 150  |
|              |      |                                                      |      |
| 142205       | 977  | AGGTAGTCATCATCGATTAGCATTAGAAGAGCAAACATCTCCAAAAGTC    | 1026 |
| OEGA9002FOR1 | 151  | CATTCCTTGTGTAGGACCCATGCACCAATCACAGTTCAATTTATTTTGTGTC | 200  |
|              |      |                                                      |      |
| 142205       | 1027 | CATTCCTTGTGTAGGACCCATGCACCAATCACAGTTCAATTTATTTTGTGTC | 1076 |
| OEGA9002FOR1 | 201  | ATAATACCACAATGACATTAGCGATTCCAATTTATAAATAAGATAGCATT   | 250  |
|              |      |                                                      |      |
| 142205       | 1077 | ATAATACCACAATGACATTAGCGATTCCAATTTATAAATAAGATAGCATT   | 1126 |
| OEGA9002FOR1 | 251  | TTCGTAAATTCCATAATTAATTTTACTCATTGATGACACTCAGAAGTC     | 300  |
|              |      |                                                      |      |
| 142205       | 1127 | TTCGTAAATTCCATAATTAATTTTACTCATTGATGACACTCAGAAGTC     | 1176 |
| OEGA9002FOR1 | 301  | TTAATCAGTCAATCAAATACGTATGTACTAAATACACTAAAGTACAAAT    | 350  |
|              |      |                                                      |      |
| 142205       | 1177 | TTAATCAGTCAATCAAATACGTATGTACTAAATACACTAAAGTACAAAT    | 1226 |
| OEGA9002FOR1 | 351  | TATCCATAACATAATATATGAAAAAAGTCAAACCTTAGTTTACTCGGAAGG  | 400  |
|              |      |                                                      |      |
| 142205       | 1227 | TATCCATAACATAATATATGAAAAAAGTCAAACCTTAGTTTACTCGGAAGG  | 1276 |

|              |      |                                                      |      |
|--------------|------|------------------------------------------------------|------|
| OEGA9002FOR1 | 401  | AAGAACCGTAAGAGTAAAGGACACTCCTCGTGATCAACCTCAACTTTCTC   | 450  |
| 142205       | 1277 |                                                      | 1326 |
| OEGA9002FOR1 | 451  | TTTATTTCTCTTGCAATGCTCCAAAAGTGTGGAAGTACTAGGACACTCATCA | 500  |
| 142205       | 1327 |                                                      | 1376 |
| OEGA9002FOR1 | 501  | AAGACTAAACAATGATAGAGGTCGTGATGTACACACATCGTACTTAACAA   | 550  |
| 142205       | 1377 |                                                      | 1426 |
| OEGA9002FOR1 | 551  | GTGATTTTTAAATTTACATCTTTGTTAGTGTGTTTTGCTTTTCCACGTCTT  | 600  |
| 142205       | 1427 |                                                      | 1476 |
| OEGA9002FOR1 | 601  | TTATAATTAACATATGAATACTGTGGAAAAATTTTATAACTACAATATAA   | 650  |
| 142205       | 1477 |                                                      | 1526 |
| OEGA9002FOR1 | 651  | TTTTAAAATTCATAGATTTGTCAAAAAACTTTCAAAAACTAAATAGCATG   | 700  |
| 142205       | 1527 |                                                      | 1576 |
| OEGA9002FOR1 | 701  | TAATGGTGGCCTTTTCCAATAAATGATCGTAACCCAT-AATTTTATGATT   | 749  |
| 142205       | 1577 |                                                      | 1626 |
| OEGA9002FOR1 | 750  | GTGACATATTATATGATGTCTAATTGTGAAATAATTTATATGTGACATAT   | 799  |
| 142205       | 1627 |                                                      | 1676 |
| OEGA9002FOR1 | 800  | TATTTGTTAGTACGCGACT                                  | 818  |
| 142205       | 1677 |                                                      | 1695 |
