# Supplementary material for: The Peculiar Landscape of Repetitive Sequences in the Olive (Olea europaea L.) Genome
Source: PubMed Central journal article supplement (PMC4007544; doi:10.1093/gbe/evu058), 2014-03-26
Supplement: supp_evu058_Barghini_et_al_SupplMat_S5.pdf [file supp_evu058_Barghini_et_al_SupplMat_S5.pdf]

Supplementary materials S5.

Structural domains in 26 putative LTR-retrotransposons re-constructed from 26 clusters produced by RepeatExplorer starting from 454 reads. For the procedure used for reconstruction see Materials and Methods. The structure was determined by dot plot analysis (to survey the occurrence of direct repeats, corresponding to putative LTRs), by BLAST against NCBI non-redundant database and analyzing sequences at Pfam (<http://pfam.sanger.ac.uk/search>) website (to identify retrotransposon domains). LTR: Long Terminal Repeat; GAG: capsid protein; INT: integrase; RT: reverse transcriptase; RH: RNase H; AP: aspartic protease; CHR: chromodomain.

| Cluster | Superfamily | 5' - LTR | GAG | INT | RT  | RH  | 3' - LTR | Sequence Length | LTR Length* |
|---------|-------------|----------|-----|-----|-----|-----|----------|-----------------|-------------|
| 24      | Copia       | YES      | YES | YES | YES | YES | YES      | 6,812           | 889         |
| 39      | Copia       | YES      | YES | YES | YES | YES | YES      | 5,069           | 806         |
| 48      | Copia       | NO       | NO  | YES | YES | YES | YES      | 4,650           | 1,545       |
| 63      | Copia       | NO       | YES | YES | YES | YES | YES      | 8,624           | 1,267       |
| 66      | Copia       | YES      | YES | YES | YES | YES | YES      | 5,326           | 799         |
| 72      | Copia       | YES      | YES | YES | YES | YES | YES      | 7,008           | 1,589       |
| 86      | Copia       | YES      | YES | YES | YES | YES | YES      | 6,049           | 1,375       |
| 90      | Copia       | YES      | YES | YES | NO  | NO  | NO       | 3,506           | 1,667       |
| 102     | Copia       | NO       | YES | YES | YES | YES | YES      | 5,465           | 1,626       |
| 108     | Copia       | NO       | YES | YES | YES | YES | YES      | 6,441           | 1,633       |
| 112     | Copia       | YES      | YES | YES | YES | YES | YES      | 6,689           | 1,746       |
| 114     | Copia       | NO       | YES | YES | YES | YES | YES      | 6,587           | 1,818       |
| 142     | Copia       | YES      | YES | YES | YES | YES | YES      | 5,197           | 789         |
| 165     | Copia       | NO       | YES | YES | YES | YES | YES      | 5,268           | 798         |
| 172     | Copia       | NO       | YES | YES | YES | YES | YES      | 5,222           | 1,575       |
| 178     | Copia       | YES      | YES | YES | YES | YES | YES      | 4,712           | 322         |
| 212     | Copia       | YES      | YES | YES | YES | YES | YES      | 4,688           | 294         |
| 213     | Copia       | YES      | YES | YES | YES | YES | YES      | 4,906           | 419         |
| 239     | Copia       | YES      | YES | YES | YES | YES | YES      | 5,028           | 541         |
| 262     | Copia       | NO       | YES | YES | YES | YES | YES      | 6,442           | 1,616       |

|     |       | 5' - LTR | GAG | AP  | RT  | RH  | INT | CHR | 3' - LTR | Sequence Length | LTR Length* |
|-----|-------|----------|-----|-----|-----|-----|-----|-----|----------|-----------------|-------------|
| 45  | Gypsy | YES      | YES | YES | YES | YES | YES | YES | YES      | 5,879           | 635         |
| 69  | Gypsy | NO       | YES | YES | YES | YES | YES | NO  | YES      | 5,813           | 1,031       |
| 146 | Gypsy | YES      | YES | NO  | YES | YES | YES | NO  | YES      | 5,608           | 782         |
| 149 | Gypsy | YES      | YES | NO  | YES | YES | YES | NO  | YES      | 6,483           | 581         |
| 157 | Gypsy | NO       | YES | YES | YES | YES | YES | NO  | YES      | 5,253           | 1,072       |
| 180 | Gypsy | NO       | YES | YES | YES | YES | YES | YES | YES      | 6,098           | 622         |

\*The longest putative LTR is reported.
